# Supplementary material for: Stimuli-responsive benzothiazole-phenothiazine derivatives: mechanochromism, AIE, acid sensing, and anticancer efficacy in benzo[ a ]pyrene-induced cancer models
Source: Royal Society of Chemistry journal article supplement (doi:10.1039/d4tb02408g), 2025-01-01
Supplement: d4tb02408g1.pdf [file d4tb02408g1.pdf]

## Supporting Information

### Stimuli-Responsive Benzothiazole-Phenothiazine derivatives: Mechanochromism, AIE, Acid Sensing, and Anticancer Efficacy in Benzo[a]pyrene-Induced Cancer Models

Ramakant Gavale,<sup>a</sup> Siddharth Singh,<sup>b</sup> Anupama Ekbote,<sup>a</sup> Hem Chandra Jha<sup>\*b</sup> and  
Rajneesh Misra<sup>\*a</sup>

<sup>a</sup> Department of chemistry, Indian Institute of Technology Indore,

Indore 453552 (India)

E-mail: [rajneeshmisra@iiti.ac.in](mailto:rajneeshmisra@iiti.ac.in)

<sup>b</sup> Department of Biosciences and Biomedical Engineering (BSBE), Indian Institute of  
Technology Indore,

Indore 453552 (India)

[hemcjha@iiti.ac.in](mailto:hemcjha@iiti.ac.in)

(\* Corresponding author)

|             |                                                 |               |
|-------------|-------------------------------------------------|---------------|
| <b>I.</b>   | <b>Experimental Section.....</b>                | <b>S3</b>     |
| <b>II.</b>  | <b>Solvatochromism .....</b>                    | <b>S4-S5</b>  |
| <b>III.</b> | <b>Aggregation Induced Emission (AIE) .....</b> | <b>S6-S7</b>  |
| <b>IV.</b>  | <b>PRXD Studies .....</b>                       | <b>S8</b>     |
| <b>V.</b>   | <b>Single Crystal X-ray analysis .....</b>      | <b>S8</b>     |
| <b>VI.</b>  | <b>Crystallographic Data .....</b>              | <b>S9-S10</b> |
| <b>VII.</b> | <b>TD-DFT Table .....</b>                       | <b>S11</b>    |

|        |                                                                                             |         |
|--------|---------------------------------------------------------------------------------------------|---------|
| VIII.  | Thermogravimetric Analysis (TGA).....                                                       | S11     |
| IX.    | Acidochromism .....                                                                         | S12     |
| X.     | Cytotoxicity and transcript expression analysis in HEK293 cells.....                        | S13     |
| XI.    | Effect of compounds on oxidative stress in HEK293 cells.....                                | S14     |
| XII.   | Effect of compounds on apoptosis in HEK293 cells.....                                       | S15     |
| XIII.  | Effects of co-exposure to B[a]P and compounds on protein expression in<br>HEK293 cells..... | S16     |
| XIV.   | The raw images for the western blot data shown in fig.12 .....                              | S17-S18 |
| XV.    | The raw images for the western blot data shown in fig. S10.....                             | S18-S19 |
| XVI.   | ADMET properties prediction using admetSAR 3.0.....                                         | S20-S21 |
| XVII.  | Toxicity of the compounds predicted using the ProTox-III.....                               | S23-S24 |
| XVIII. | SuperPRED target prediction of probable macromolecular targets for<br>compounds.....        | S25-S28 |
| XIX.   | Primer sequence for qRT-PCR.....                                                            | S29     |
| XX.    | The drug vs. normalized response data.....                                                  | S29     |
| XXI.   | Copies of <sup>1</sup> H NMR, <sup>13</sup> C NMR and HRMS spectra of new compounds. ....   | S30-S35 |
| XXII.  | DFT and TD-DFT data .....                                                                   | S36-S61 |

## Experimental Section

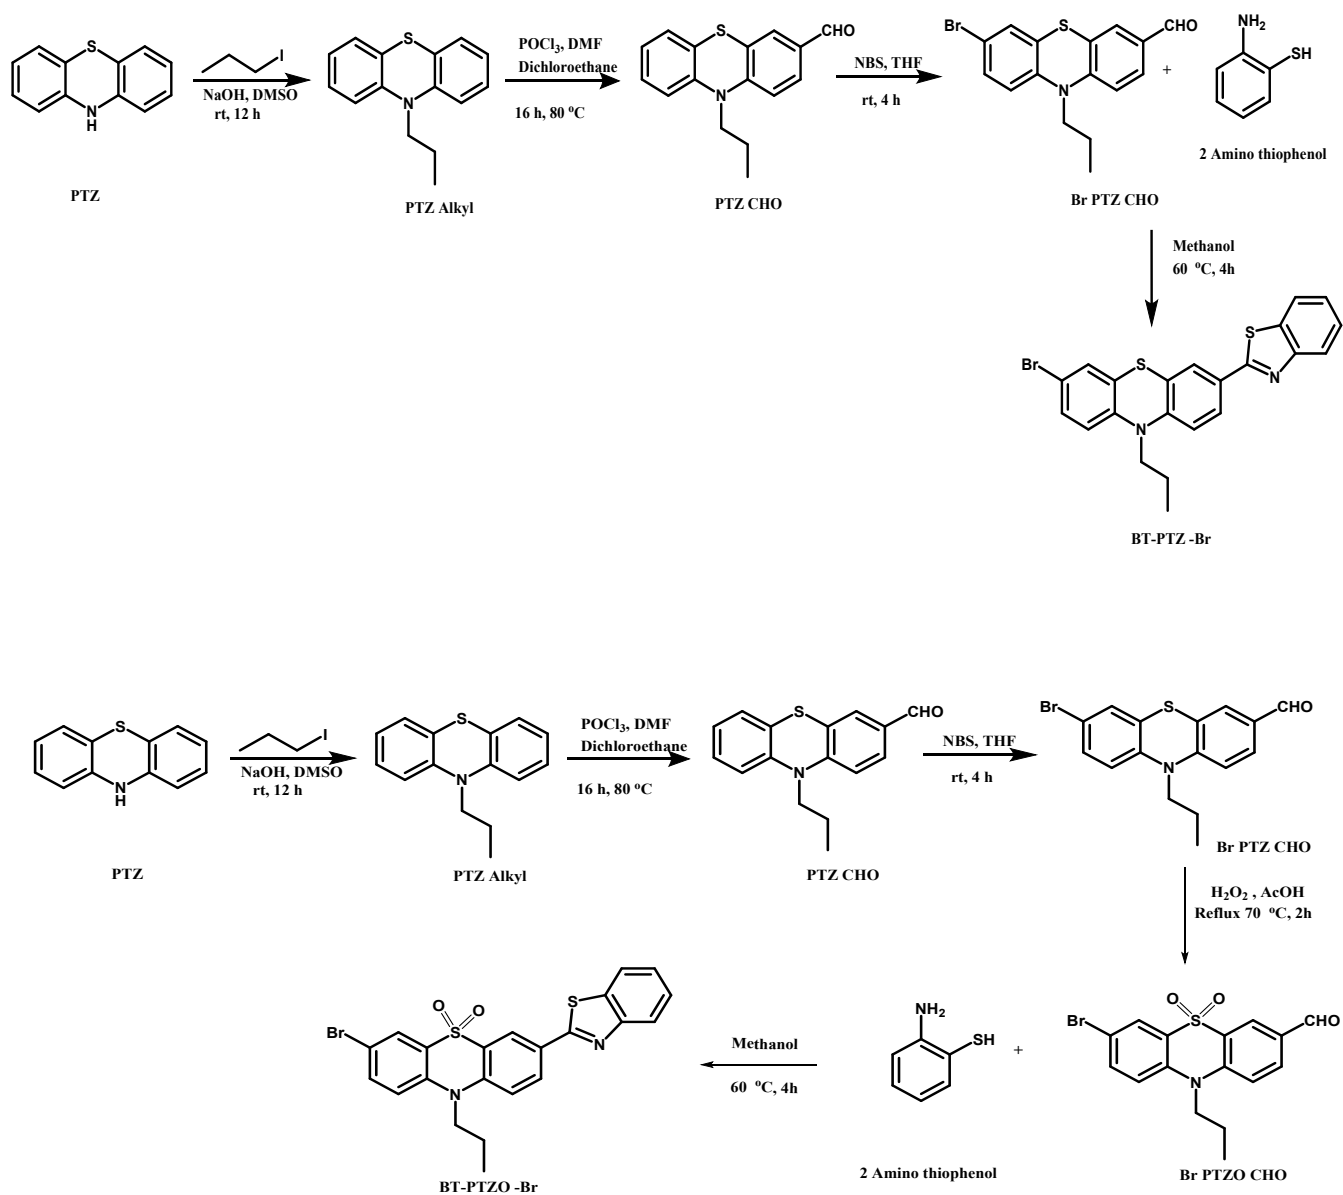

**Scheme S1** Synthetic scheme for Intermediate BT-PTZ-Br and BT-PTZO-Br.

## Solvatochromism:

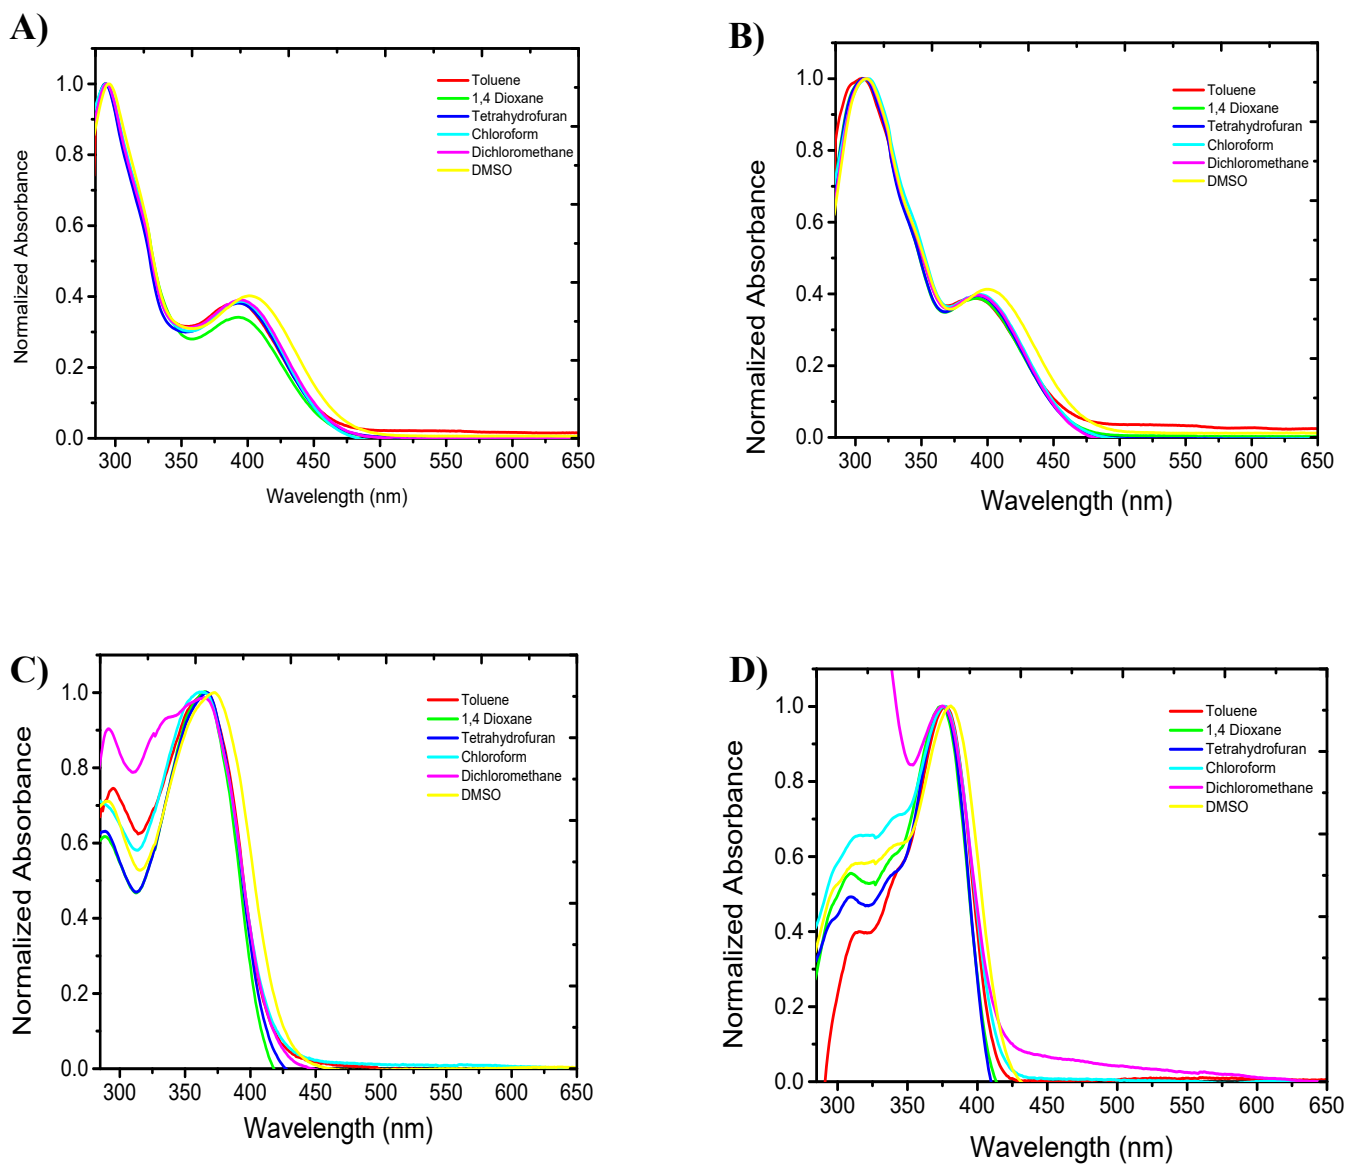

**Fig. S1** UV- vis absorption Spectra of (A) **BT-PTZ-1**, (B) **BT-PTZ-2**, (C) **BT-PTZO1** and (D) **BT-PTZO-2** in different polarity of solvents respectively.

**Table S1** Photophysical properties of the compounds **BT-PTZ-1**, **BT-PTZ-2**, **BT-PTZO1** and **BT-PTZO-2**

| <b>Compound</b>  | <b>Solvent</b>  | $\lambda_{abs}$ (nm) <sup>a</sup> | $\lambda_{em}$ (nm) <sup>a</sup> | <b>Stokes shift</b><br>(cm <sup>-1</sup> ) | $\phi_f$ <sup>b</sup> |
|------------------|-----------------|-----------------------------------|----------------------------------|--------------------------------------------|-----------------------|
| <b>BT-PTZ-1</b>  | Toluene         | 393                               | 515                              | 6028                                       | 0.55                  |
|                  | 1,4 Dioxane     | 393                               | 539                              | 6893                                       | 0.60                  |
|                  | Tetrahydrofuran | 394                               | 546                              | 7065                                       | 0.56                  |
|                  | Chloroform      | 395                               | 550                              | 7135                                       | 0.58                  |
|                  | Dichloromethane | 395                               | 550                              | 7135                                       | 0.61                  |
|                  | DMSO            | 402                               | 567                              | 7239                                       | 0.31                  |
| <b>BT-PTZ-2</b>  | Toluene         | 392                               | 529                              | 6607                                       | 0.58                  |
|                  | 1,4 Dioxane     | 393                               | 537                              | 6824                                       | 0.62                  |
|                  | Tetrahydrofuran | 393                               | 543                              | 7029                                       | 0.60                  |
|                  | Chloroform      | 394                               | 548                              | 7132                                       | 0.64                  |
|                  | Dichloromethane | 394                               | 558                              | 7459                                       | 0.62                  |
|                  | DMSO            | 401                               | 572                              | 7455                                       | 0.66                  |
| <b>BT-PTZO-1</b> | Toluene         | 364                               | 493                              | 7189                                       | 0.35                  |
|                  | 1,4 Dioxane     | 366                               | 482                              | 6576                                       | 0.40                  |
|                  | Tetrahydrofuran | 367                               | 522                              | 8090                                       | 0.31                  |
|                  | Chloroform      | 364                               | 508                              | 7787                                       | 0.34                  |
|                  | Dichloromethane | 365                               | 405                              | 2706                                       | 0.11                  |
|                  | DMSO            | 373                               | 415                              | 2713                                       | 0.06                  |
| <b>BT-PTZO-2</b> | Toluene         | 377                               | 429                              | 3215                                       | 0.22                  |
|                  | 1,4 Dioxane     | 374                               | 441                              | 4062                                       | 0.31                  |
|                  | Tetrahydrofuran | 376                               | 490                              | 6187                                       | 0.57                  |
|                  | Chloroform      | 377                               | 489                              | 6076                                       | 0.53                  |
|                  | Dichloromethane | 376                               | 529                              | 7692                                       | 0.55                  |

|  |      |     |     |      |      |
|--|------|-----|-----|------|------|
|  | DMSO | 381 | 599 | 9552 | 0.10 |
|--|------|-----|-----|------|------|

(<sup>a</sup> absorption and emission maxima values recorded in different polarity solvents, <sup>b</sup> the fluorescence quantum yields were measured using quinine sulphate as a standard in 0.5 M H<sub>2</sub>SO<sub>4</sub>).

### Aggregation Induced Emission (AIE)

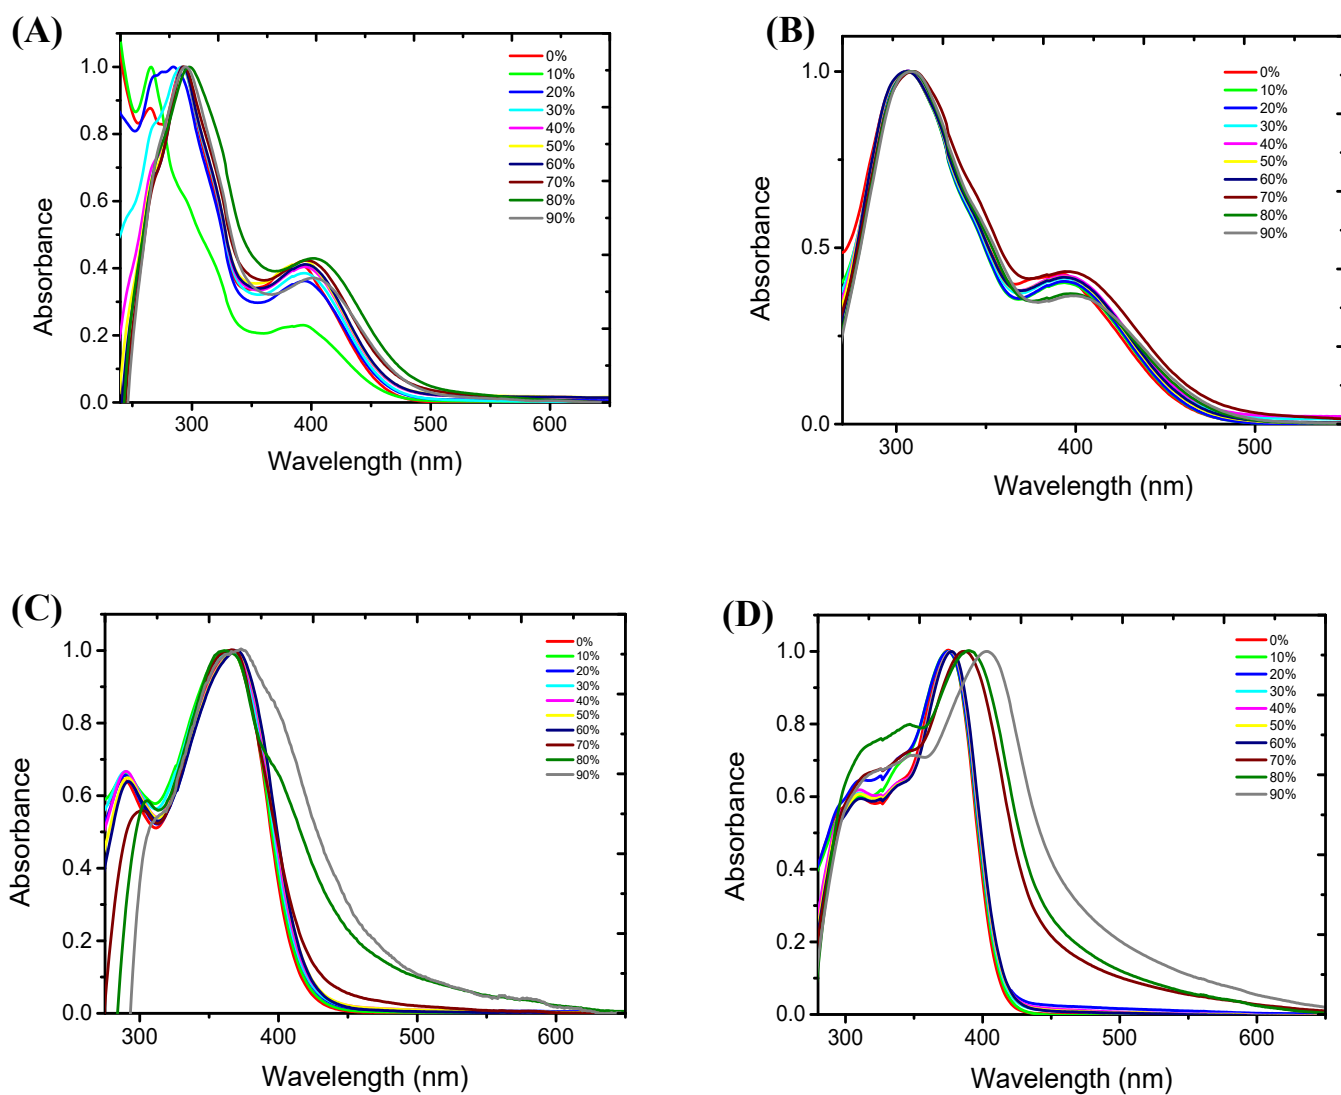

**Fig. S2** Absorption spectra of (A) BT-PTZ-1, (B) BT-PTZ-2, (C) BT-PTZO-1, and (D) BT-PTZO-2 in different THF- Water Mixture with increasing water percentage.

## Aggregation Induced Emission (AIE)

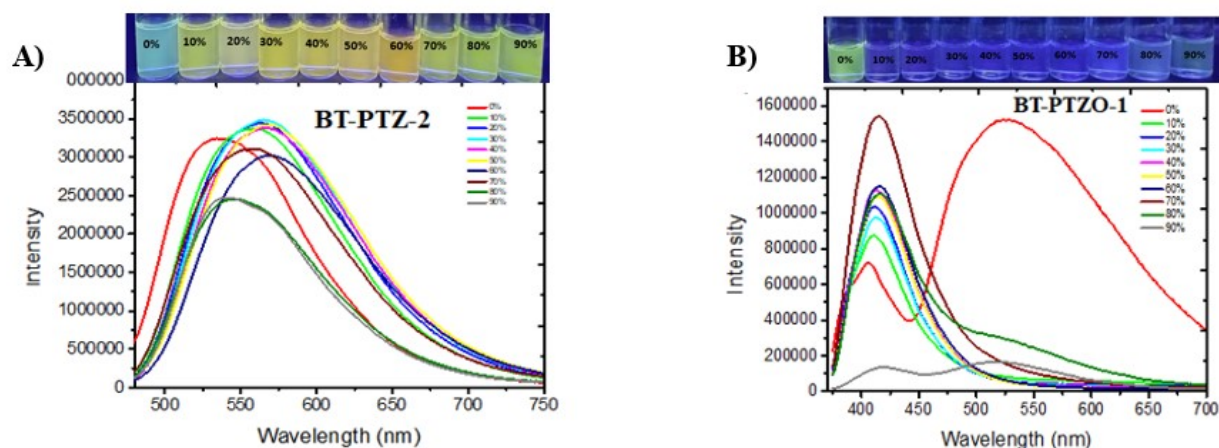

**Fig. S3** Emission spectra of A) **BT-PTZ-2** and D) **BT-PTZO-1** in different THF-Water Mixture with increasing water percentage (Inset: Photographs under 365 nm UV illuminations.)

**Table S2.** Fluorescence quantum yields of **BT-PTZ-1**, **BT-PTZ-2**, **BT-PTZO-1**, and **BT-PTZO-2** in different THF-water mixtures with increasing water percentage.

| Water Vol % | $\phi_f^a$ |          |           |           |
|-------------|------------|----------|-----------|-----------|
|             | BT-PTZ-1   | BT-PTZ-2 | BT-PTZO-1 | BT-PTZO-2 |
| 0%          | 0.45       | 0.44     | 0.22      | 0.39      |
| 10%         | 0.41       | 0.45     | 0.02      | 0.11      |
| 20%         | 0.42       | 0.43     | 0.02      | 0.09      |
| 30%         | 0.40       | 0.43     | 0.02      | 0.09      |
| 40%         | 0.39       | 0.42     | 0.02      | 0.06      |
| 50%         | 0.33       | 0.40     | 0.02      | 0.05      |
| 60%         | 0.25       | 0.45     | 0.03      | 0.05      |
| 70%         | 0.28       | 0.46     | 0.06      | 0.35      |
| 80%         | 0.43       | 0.39     | 0.08      | 0.32      |
| 90%         | 0.25       | 0.40     | 0.06      | 0.30      |

(<sup>a</sup> Fluorescence quantum yields recorded using quinine sulphate as a standard in 0.5 M H<sub>2</sub>SO<sub>4</sub> solution.)

## PXRD Studies

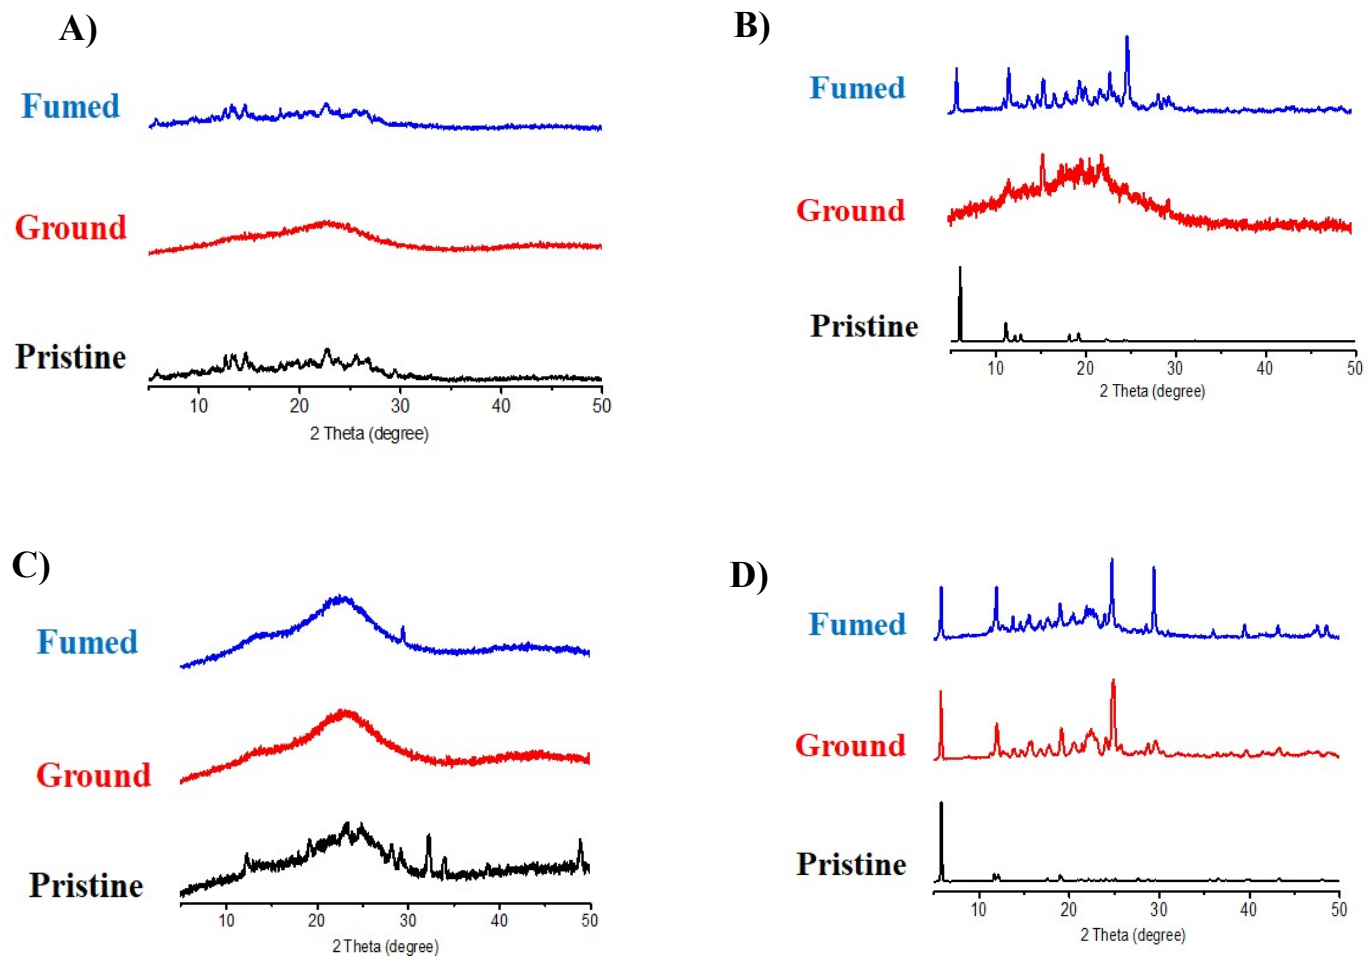

**Fig. S4** PXRD curves of (A) BT-PTZ-1, (B) BT-PTZ-2, (C) BT-PTZO-1 and (D) BT-PTZO-2 in pristine, ground, and fumed form



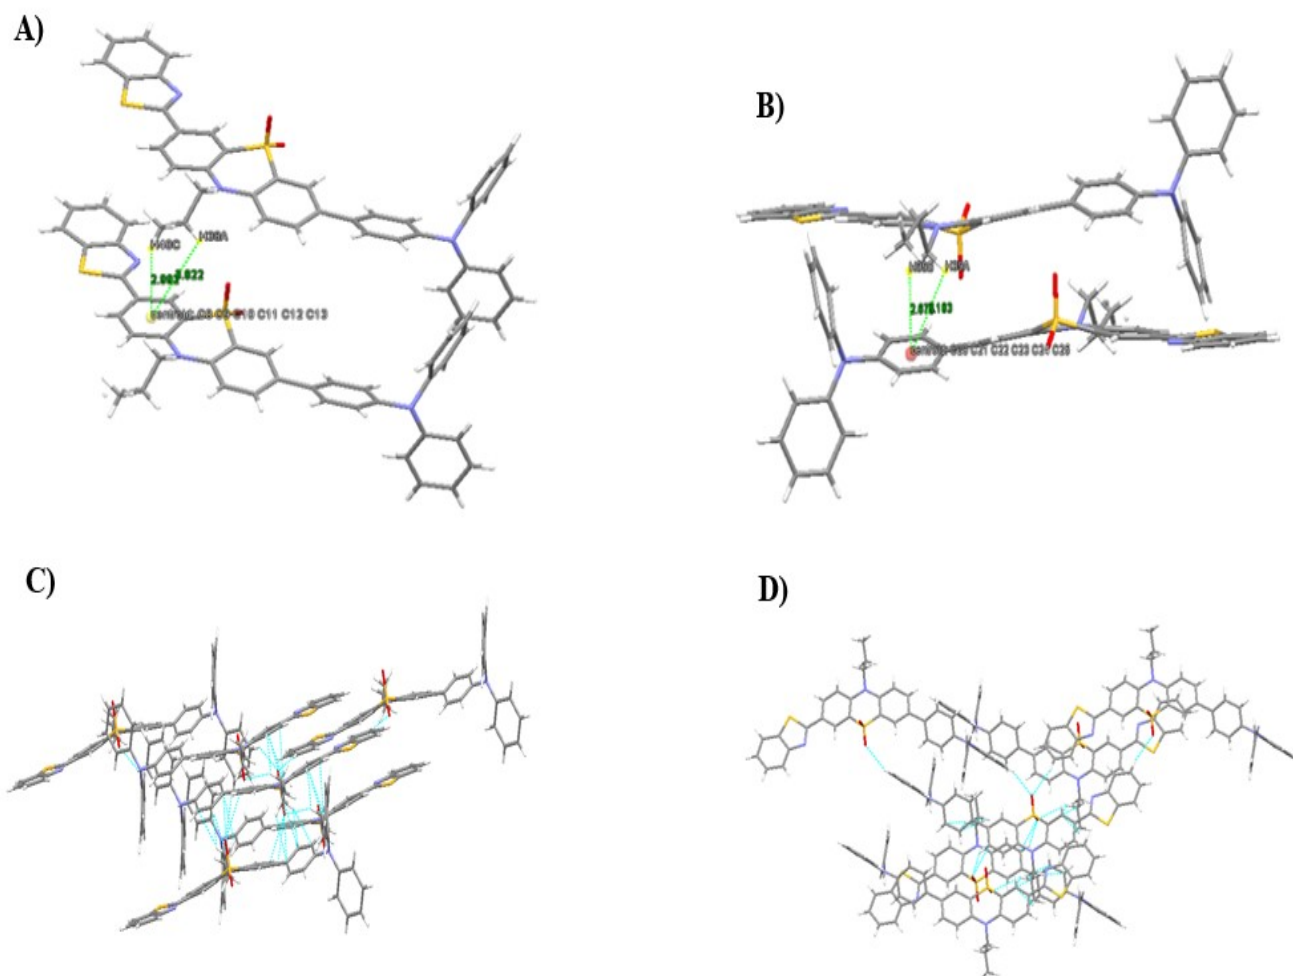

**Fig. S5** A) and B) crystal packing diagram of **BT-PTZO-2** depicting intermolecular interactions, C) and D) Crystal packing of **BT-PTZO-2** and different dimeric interactions.

### Crystallographic data

The crystal and refinement data are summarized in Table S2. The CCDC number **2252673** contains the supplementary crystallographic data for BT-PTZO-2. These data can be obtained free of charge via [www.ccdc.cam.ac.uk](http://www.ccdc.cam.ac.uk) (or from the Cambridge Crystallographic Data Centre, 12 union Road, Cambridge CB21 EZ, UK; Fax: (+44) 1223- 336-033; or [deposit@ccdc.cam.ac.uk](mailto:deposit@ccdc.cam.ac.uk))

**Table S3** Crystal data and structure refinement for **BT-PTZO-2**.

| <b>Identification code</b>        | <b>shelx</b>                                |
|-----------------------------------|---------------------------------------------|
| Empirical formula                 | C40 H31 N3 O2 S2                            |
| Formula weight                    | 649.80                                      |
| Temperature                       | 293(2) K                                    |
| Wavelength                        | 0.71073 Å                                   |
| Crystal system, space group       | Triclinic, P -1                             |
| a/(Å)                             | 8.0182                                      |
| b/(Å)                             | 14.2098                                     |
| c/(Å)                             | 15.2021                                     |
| Alpha/(°)                         | 85.714                                      |
| Beta/(°)                          | 83.289                                      |
| Gamma/(°)                         | 80.170                                      |
| Volume                            | 1692.30(18) Å <sup>3</sup>                  |
| Z, Calculated density             | 2, 1.275 Mg/m <sup>3</sup>                  |
| Absorption coefficient            | 0.197 mm <sup>-1</sup>                      |
| F(000)                            | 680                                         |
| Crystal size                      | 0.400 x 0.350 x 0.320 mm                    |
| Theta range for data collection   | 3.048 to 29.840 deg.                        |
| Reflections collected / unique    | 16587 / 8026 [R(int) = 0.0844]              |
| Completeness to theta             | 25.242 99.5 %                               |
| Refinement method                 | Full-matrix least-squares on F <sup>2</sup> |
| Data / restraints / parameters    | 8026 / 35 / 491                             |
| Goodness-of-fit on F <sup>2</sup> | 1.031                                       |
| Final R indices [I>2sigma(I)]     | R1 = 0.0784, wR2 = 0.2177                   |
| R indices (all data)              | R1 = 0.1409, wR2 = 0.2903                   |
| Extinction coefficient            | n/a                                         |
| Largest diff. peak and hole       | 0.333 and -0.506 e.Å <sup>-3</sup>          |

**Table S4** The computed vertical transitions; oscillator strengths and configurations of **BT-PTZ-1**, **BT-PTZ-2**, **BT-PTZO-1** and **BT-PTZO-2**.

| Compound         | Wavelength (nm) | $f^a$  | Configuration         | Assignment  |
|------------------|-----------------|--------|-----------------------|-------------|
| <b>BT-PTZ-1</b>  | 301             | 0.7478 | (HOMO-2)→LUMO(0.4689) | $\pi-\pi^*$ |
|                  | 377             | 0.1440 | HOMO→(LUMO+2)(0.6167) | ICT         |
| <b>BT-PTZ-2</b>  | 319             | 0.7456 | (HOMO-2)→LUMO(0.6157) | $\pi-\pi^*$ |
|                  | 374             | 0.4870 | HOMO→(LUMO+1)(0.6496) | ICT         |
| <b>BT-PTZO-1</b> | 295             | 0.2347 | (HOMO-3)→LUMO(0.1516) | $\pi-\pi^*$ |
|                  | 356             | 0.6204 | HOMO→(LUMO+2)(0.5145) | ICT         |
| <b>BT-PTZO-2</b> | 294             | 0.2175 | (HOMO-2)→LUMO(0.5898) | $\pi-\pi^*$ |
|                  | 370             | 0.7139 | HOMO→(LUMO+2)(0.6535) | ICT         |

<sup>a</sup>Oscillator strength.

## Thermal Properties

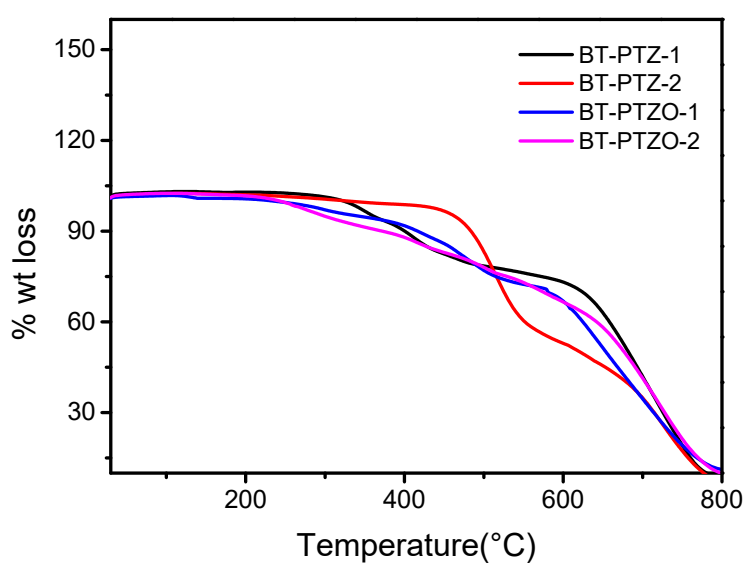

**Fig. S6** Thermogravimetric analysis (TGA) of **BT-PTZ-1**, **BT-PTZ-2**, **BT-PTZO-1** and **BT-PTZO-2** measured at a heating rate of  $10\text{ }^\circ\text{C min}^{-1}$  under a nitrogen atmosphere.

## Acidochromism

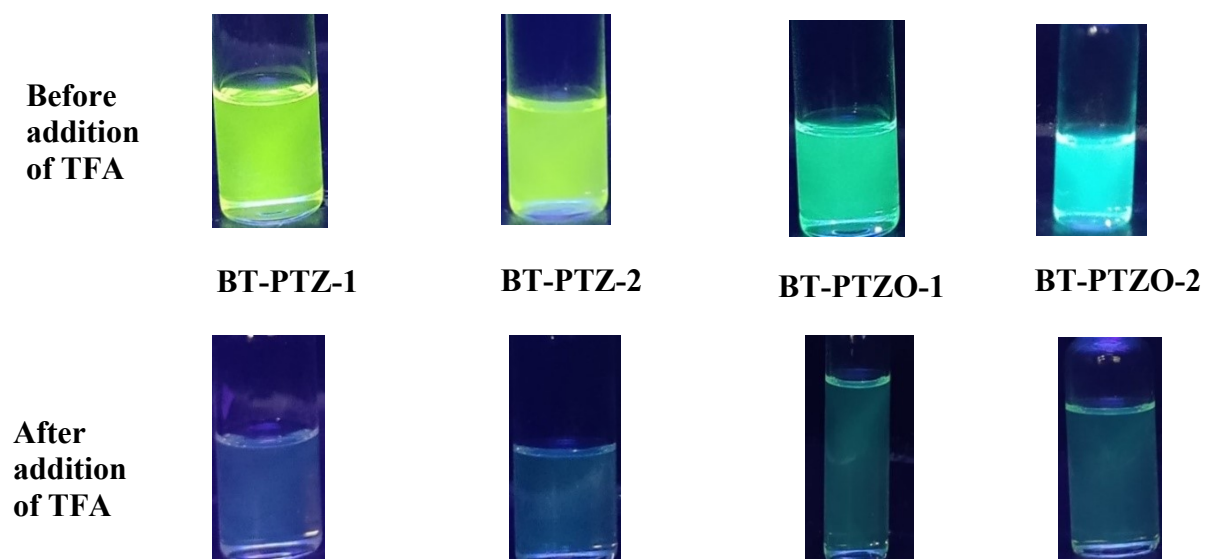

**Fig. S7** Emission photographs of **BT-PTZ-1**, **BT-PTZ-2**, **BT-PTZO-1** and **BT-PTZO-2** in response to TFA.

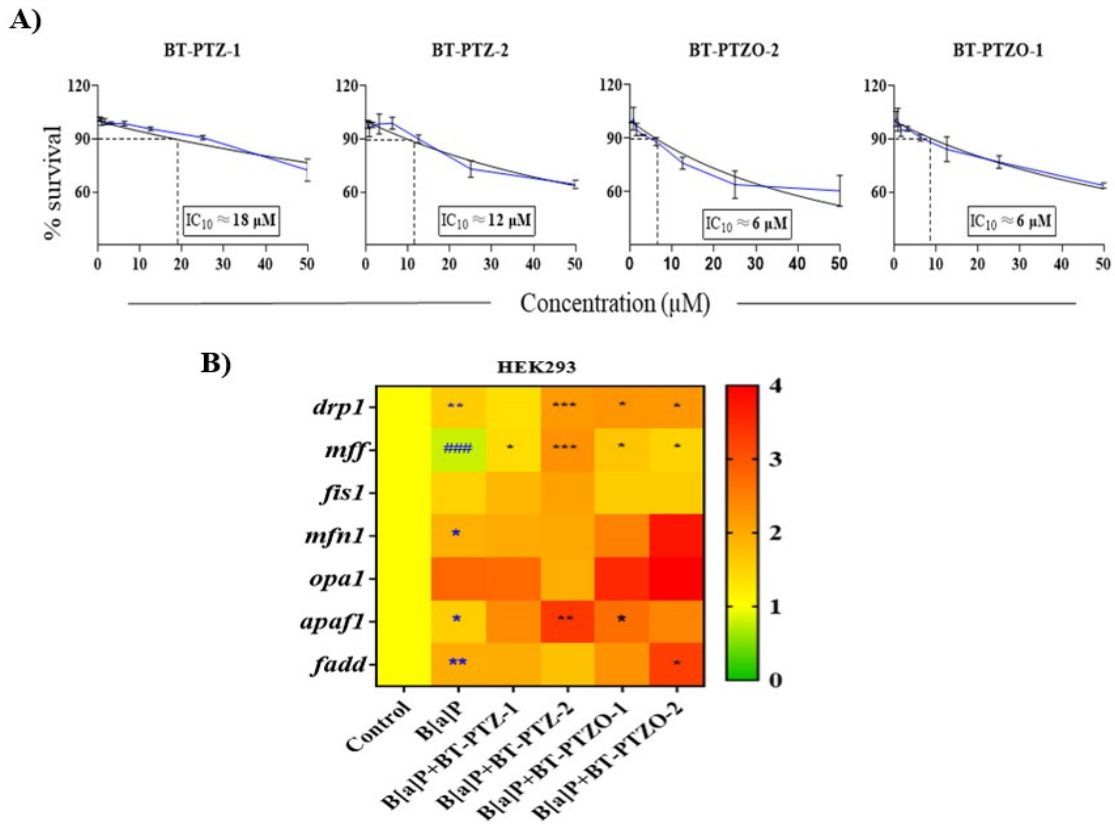

**Fig. S8 Cytotoxicity and transcript expression analysis in HEK293 cells.** (A) Cytotoxicity assessment via MTT assay of HEK293 cells after 24-hour exposure to the compounds. (B) Heat map depicting relative transcript expression of mitochondrial-associated markers (*drp1*, *fis1*, *mff*, *mfn1*, *opa1*) and cell death-associated markers (*fadd*, *apaf1*) in HEK293 cells. Cells were pre-exposed to B[a]P for 24 hours, followed by compound treatment for an additional 24 hours. Experiments were conducted with three biological replicates and two technical replicates. Results are presented as the mean  $\pm$  standard deviation (SD). Statistical analysis was performed using an unpaired t-test, with p-values calculated using GraphPad Prism version 9.5.1. Statistically significant p-values were denoted as follows: \* or # ( $p < 0.05$ ), \*\* or ## ( $p < 0.01$ ), and \*\*\* or ### ( $p < 0.001$ ), indicating upregulation or downregulation, respectively.

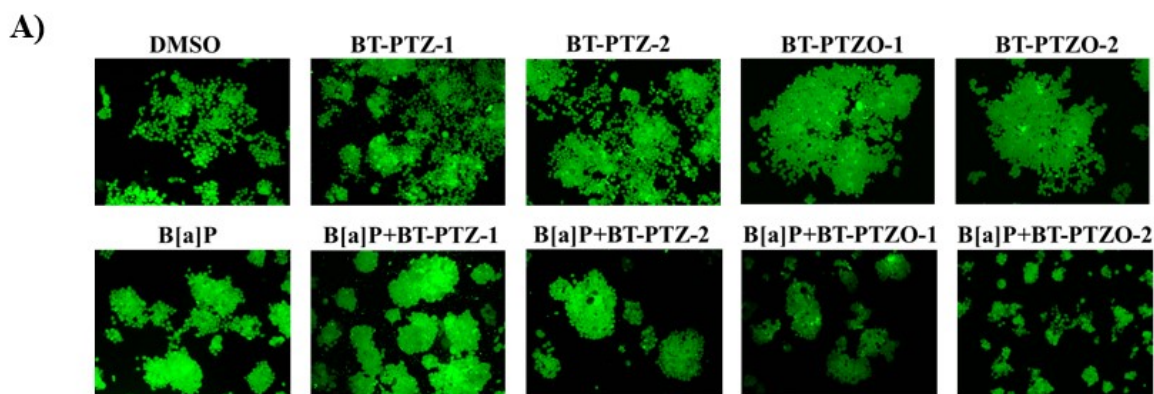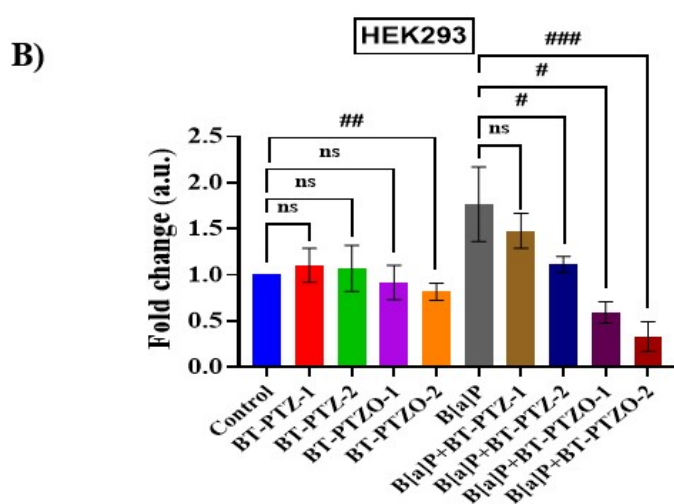

**Fig. S9 Effect of compounds on oxidative stress in HEK293 cells.** (A) Fluorescence microscopy image of HEK293 cells stained with H2DCFDA dye, following 24-hour pre-exposure to B[a]P and subsequent 24-hour treatment with compounds. (B) Quantification of fluorescence intensities of the green signal in HEK293 cells. Experiments were conducted with three biological replicates and two technical replicates. Results are presented as the mean  $\pm$  standard deviation (SD). Statistical analysis was performed using an unpaired t-test, with p-values calculated using GraphPad Prism version 9.5.1. Statistically significant p-values were denoted as follows: \* or # ( $p < 0.05$ ), \*\* or ## ( $p < 0.01$ ), and \*\*\* or ### ( $p < 0.001$ ), indicating upregulation or downregulation, respectively.

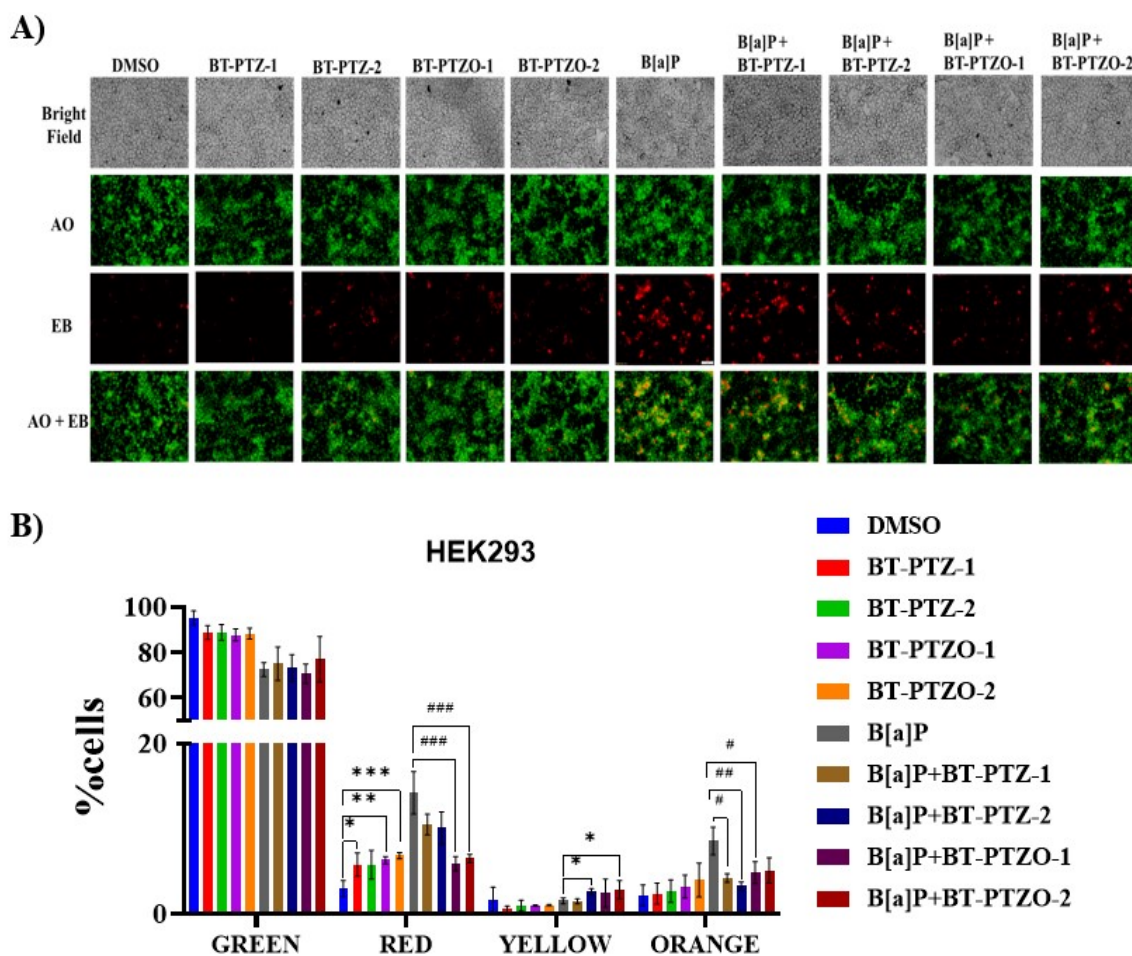

**Fig. S10 Effect of compounds on apoptosis in HEK293 cells.** (A) Representative image displaying live (green), necrotic (red), and early/late apoptotic (orange/yellow) cells as detected by AO/EB staining under fluorescence microscopy. (B) Bar graph quantifying live, necrotic, early, and late apoptotic cells in HEK293 cells following 24-hour pre-exposure to B[a]P and subsequent 24-hour compound treatment. Experiments were conducted with three biological replicates. Results are presented as mean  $\pm$  standard deviation (SD). Statistical analysis was performed using an unpaired t-test, with p-values calculated using GraphPad Prism version 9.5.1. Statistically significant p-values are denoted as follows: \* or # ( $p < 0.05$ ), \*\* or ## ( $p < 0.01$ ), and \*\*\* or ### ( $p < 0.001$ ), indicating upregulation or downregulation, respectively.

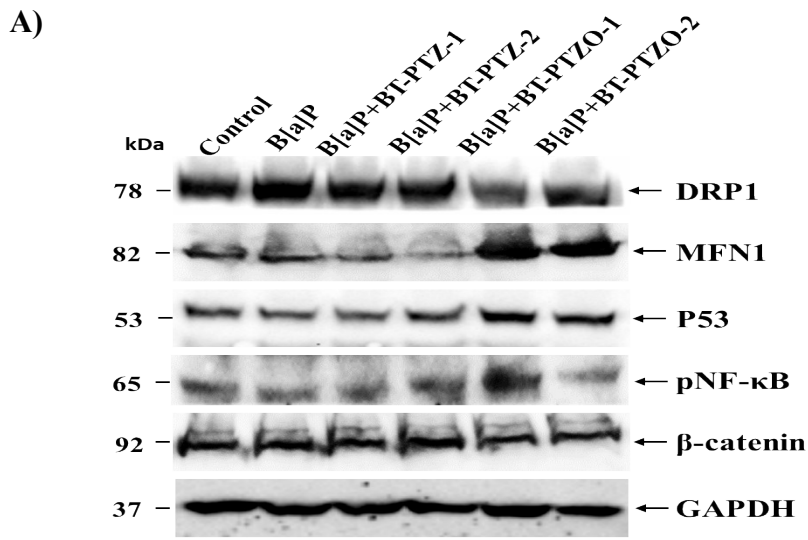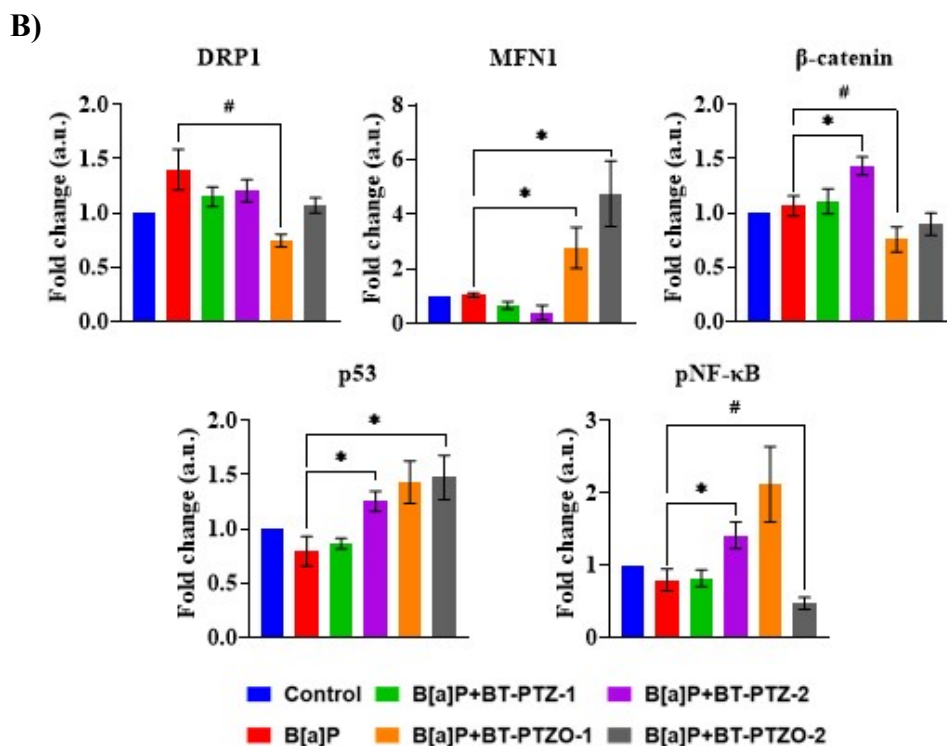

**Fig. S11 Effects of co-exposure to B[a]P and compounds on DRP1, MFN1, p53, β-Catenin, and pNF-κB expression in HEK293 cells.** (A) Representative Western blot image displaying the expression levels of DRP1, MFN1, p53, β-catenin, and pNF-κB following 24-hour pre-exposure to B[a]P and subsequent 24-hour treatment with compounds. (B) Bar graph quantifying the Western blot results. Experiments were conducted with three biological replicates and two technical replicates. Results are presented as mean ± standard deviation (SD). Statistical analysis was performed using an unpaired t-test, with p-values calculated using GraphPad Prism version 9.5.1. Statistically significant p-values are denoted as follows: \* or # ( $p < 0.05$ ), \*\* or ## ( $p < 0.01$ ), and \*\*\* or ### ( $p < 0.001$ ), indicating upregulation or downregulation, respectively.



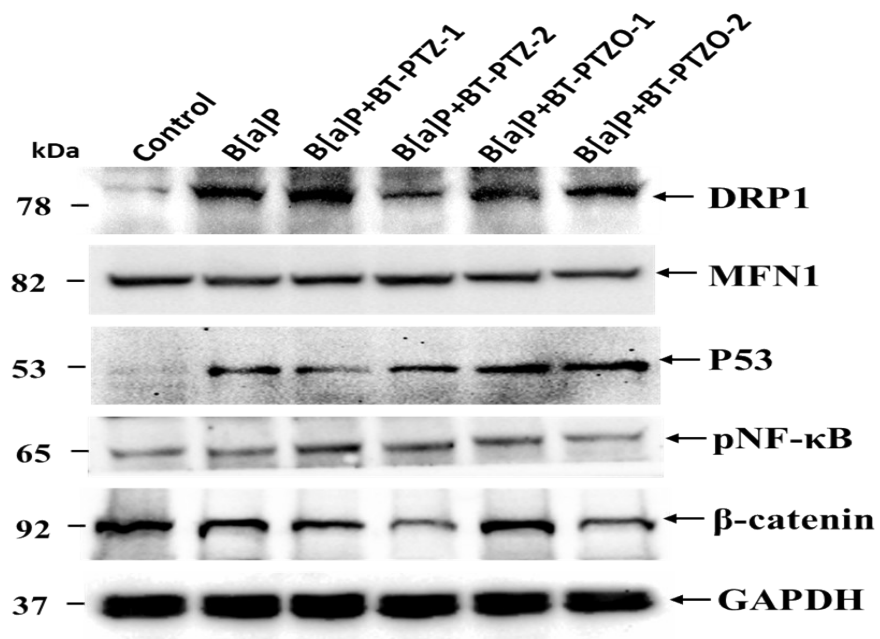

1] DRP1

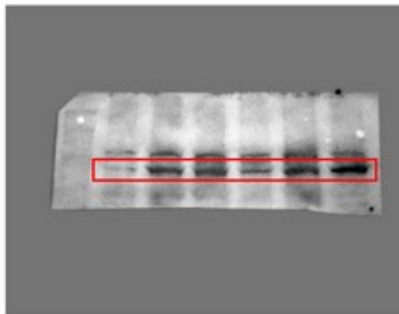

2] MFN1

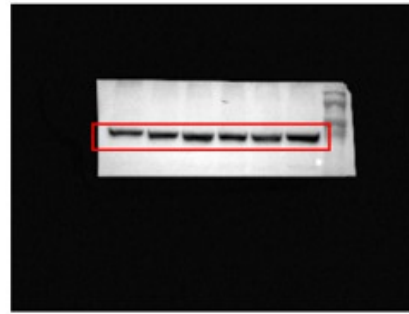

3] P53

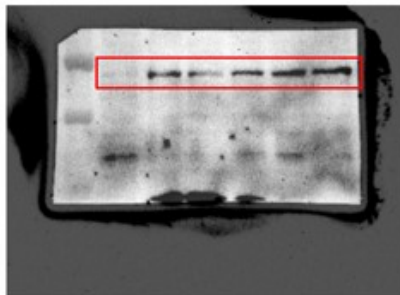

4] pNF-κβ

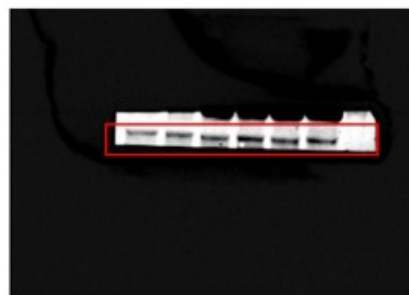

5]  $\beta$ -catenin

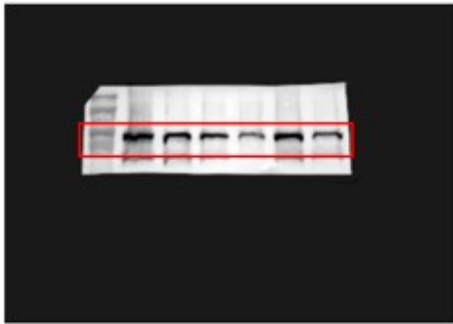

6] GAPDH

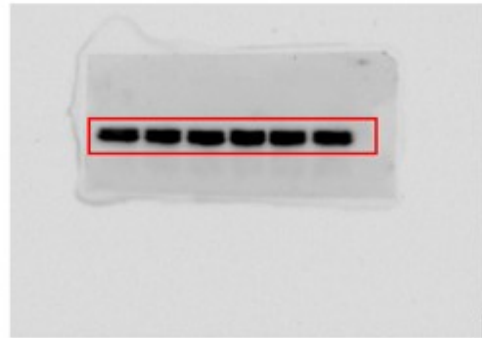

Fig. S12 The raw images for the western blot data shown in fig.12 .

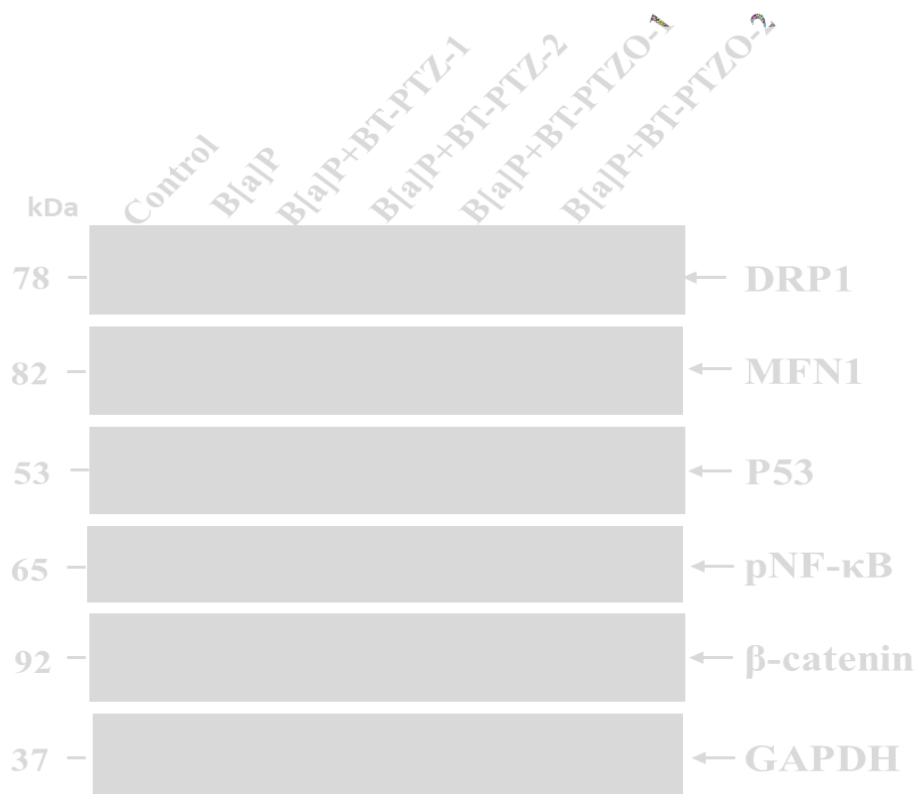

1) DRP1

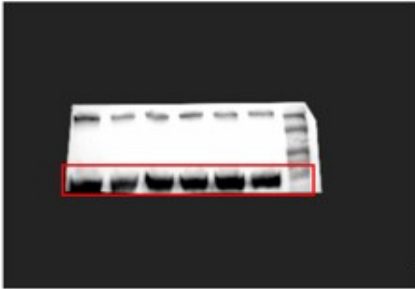

2) MFN1

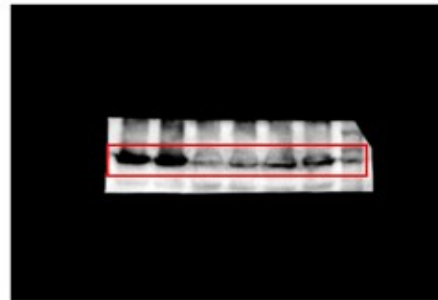

3) P53

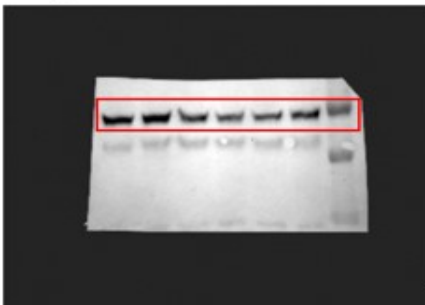

4) pNF- $\kappa$ B

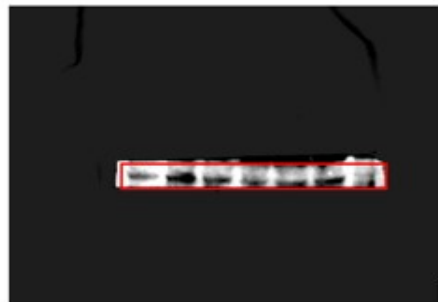

5)  $\beta$ -catenin

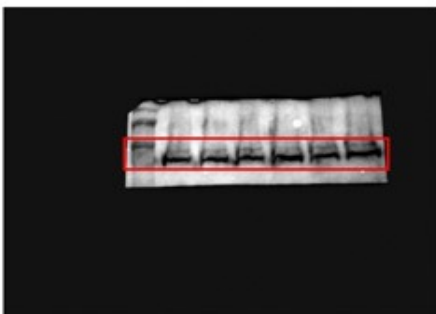

6) GAPDH

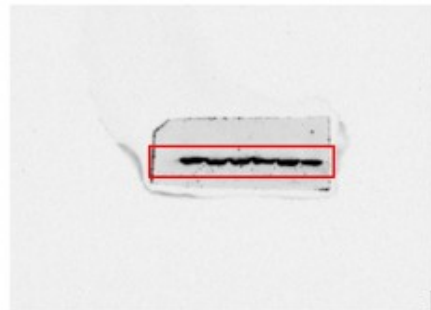

Fig. S13 The raw images for the western blot data shown in fig. S10.

**Table S5** ADMET properties prediction using admetSAR 3.0

| <b>Name</b>                     | <b>BT-PTZ-1</b> | <b>BT-PTZ-2</b> | <b>BT-PTZO-1</b> | <b>BT-PTZO-2</b> |
|---------------------------------|-----------------|-----------------|------------------|------------------|
| <b>MW</b>                       | 613.17          | 617.2           | 645.16           | 649.19           |
| <b>Vol</b>                      | 626.3902527     | 651.8598071     | 643.9707066      | 669.440261       |
| <b>Dense</b>                    | 0.978894543     | 0.946829354     | 1.001846813      | 0.969750458      |
| <b>nHA</b>                      | 3               | 3               | 5                | 5                |
| <b>nHD</b>                      | 0               | 0               | 0                | 0                |
| <b>TPSA</b>                     | 19.37           | 19.37           | 53.51            | 53.51            |
| <b>nRot</b>                     | 6               | 7               | 6                | 7                |
| <b>nRing</b>                    | 4               | 4               | 4                | 4                |
| <b>MaxRing</b>                  | 14              | 14              | 14               | 14               |
| <b>nHet</b>                     | 6               | 5               | 8                | 7                |
| <b>fChar</b>                    | 0               | 0               | 0                | 0                |
| <b>nRig</b>                     | 42              | 44              | 44               | 46               |
| <b>Flex</b>                     | 0.142857143     | 0.159090909     | 0.136363636      | 0.152173913      |
| <b>nStereo</b>                  | 0               | 0               | 0                | 0                |
| <b>gasa</b>                     | 1               | 0               | 0                | 0                |
| <b>QED</b>                      | 0.186           | 0.177           | 0.18             | 0.172            |
| <b>Synth</b>                    | 2.882           | 2.71            | 3.039            | 2.87             |
| <b>Fsp3</b>                     | 0.162           | 0.075           | 0.162            | 0.075            |
| <b>MCE-18</b>                   | 80              | 78              | 86               | 84               |
| <b>Natural Product-likeness</b> | -1.07           | -1.157          | -1.232           | -1.194           |
| <b>Chelating</b>                | ['-']           | ['-']           | ['-']            | ['-']            |
| <b>PAINS</b>                    | ['-']           | ['-']           | ['-']            | ['-']            |
| <b>Lipinski</b>                 | 1               | 1               | 1                | 1                |
| <b>Pfizer</b>                   | 1               | 1               | 1                | 1                |
| <b>GSK</b>                      | 1               | 1               | 1                | 1                |
| <b>GoldenTriangle</b>           | 1               | 1               | 1                | 1                |
| <b>logS</b>                     | -11.70470785    | -12.49938122    | -9.33835679      | -9.982755029     |
| <b>logD</b>                     | 5.019515919     | 5.860358902     | 4.086822113      | 4.738757919      |
| <b>logP</b>                     | 10.88641515     | 11.69051075     | 8.19915726       | 9.070230435      |
| <b>mp</b>                       | 267.8534865     | 298.4897542     | 219.1994953      | 255.2865362      |
| <b>bp</b>                       | 610.8250513     | 653.9644682     | 557.2079704      | 590.1259137      |
| <b>pka_acidic</b>               | 14.94742829     | 14.59363633     | 12.44511574      | 12.39267053      |
| <b>pka_basic</b>                | 0.866336438     | -0.198443628    | 1.512711917      | 0.671159463      |
| <b>caco2</b>                    | -4.662304949    | -4.998146451    | -4.748760471     | -5.167901826     |
| <b>MDCK</b>                     | -4.810895703    | -4.577096363    | -4.829729335     | -4.761904682     |
| <b>PAMPA</b>                    | 0.002405705     | 0.007756432     | 0.019457929      | 0.054873306      |
| <b>pgp_inh</b>                  | 0.960912108     | 0.913223684     | 0.962376952      | 0.925488174      |
| <b>pgp_sub</b>                  | 0.878201783     | 0.504688263     | 0.238809392      | 0.053119496      |
| <b>hia</b>                      | 1.19E-06        | 9.54E-07        | 1.43E-06         | 1.19E-06         |
| <b>f20</b>                      | 0.908893771     | 0.054148018     | 0.949379977      | 0.09885639       |
| <b>f30</b>                      | 0.847859979     | 0.037126482     | 0.955377143      | 0.153490484      |
| <b>f50</b>                      | 0.99987648      | 0.791023985     | 0.999018654      | 0.331597924      |
| <b>OATP1B1</b>                  | 0.906186938     | 0.987992525     | 0.488739312      | 0.884528637      |

| Name              | BT-PTZ-1    | BT-PTZ-2    | BT-PTZO-1   | BT-PTZO-2    |
|-------------------|-------------|-------------|-------------|--------------|
| OATP1B3           | 0.968854427 | 0.984597564 | 0.12046627  | 0.216627389  |
| BCRP              | 0.685575366 | 0.800441444 | 0.008124067 | 0.015747594  |
| BSEP              | 1           | 1           | 1           | 1            |
| BBB               | 0.865089655 | 0.020429241 | 0.02347986  | 7.95E-05     |
| MRP1              | 0.984040618 | 0.974593639 | 0.985419691 | 0.972355604  |
| PPB               | 100.2261662 | 100.4139467 | 99.76397466 | 99.83210228  |
| logVDss           | 1.103490089 | 1.158085668 | 0.023477166 | -0.034064217 |
| Fu                | 0.22889294  | 0.110121911 | 0.237394354 | 0.146803202  |
| CYP1A2-inh        | 0.999164701 | 0.994454324 | 0.999860764 | 0.996490777  |
| CYP1A2-sub        | 1           | 0.999267757 | 1           | 0.993070304  |
| CYP2C19-inh       | 0.999999762 | 0.999999642 | 0.999843955 | 0.999188364  |
| CYP2C19-sub       | 0.709028244 | 2.30E-05    | 0.996316791 | 0.002842188  |
| CYP2C9-inh        | 0.147088066 | 0.959410667 | 0.06779772  | 0.934987187  |
| CYP2C9-sub        | 0.990382016 | 7.91E-05    | 0.968025744 | 3.43E-05     |
| CYP2D6-inh        | 0.999931455 | 0.951596081 | 0.99946636  | 0.577515483  |
| CYP2D6-sub        | 0.999994993 | 0.98550421  | 0.983913004 | 0.006810627  |
| CYP3A4-inh        | 0.995847583 | 0.999016643 | 0.991821826 | 0.996976256  |
| CYP3A4-sub        | 0.993088663 | 0.79436779  | 0.60070926  | 0.023552533  |
| CYP2B6-inh        | 0.99995232  | 1           | 0.99998498  | 1            |
| CYP2B6-sub        | 0.963571727 | 0.000167654 | 0.723377585 | 2.67E-05     |
| CYP2C8-inh        | 0.999999881 | 1           | 0.999965787 | 1            |
| LM-human          | 0.999774635 | 0.998904943 | 0.999896288 | 0.999489903  |
| cl-plasma         | 6.530465614 | 4.17422271  | 5.129742703 | 3.154428946  |
| t0.5              | 0.249020897 | 0.427587069 | 0.258036386 | 0.412301049  |
| BCF               | 2.178975535 | 2.432112095 | 1.715559827 | 2.082505506  |
| IGC50             | 5.825891509 | 5.679155321 | 5.229168985 | 5.090145472  |
| LC50DM            | 8.038096167 | 7.389901092 | 7.044876433 | 6.530842341  |
| LC50FM            | 8.608012446 | 7.692378945 | 7.06376808  | 6.382762877  |
| hERG              | 0.968768179 | 0.859173656 | 0.910451889 | 0.667252421  |
| hERG-10um         | 0.970196962 | 0.97993958  | 0.938197732 | 0.958041131  |
| DILI              | 0.999999762 | 0.999966621 | 0.999998569 | 0.999805868  |
| Ames              | 0.845941484 | 0.606791556 | 0.895098686 | 0.703343034  |
| ROA               | 0.768248916 | 0.188905492 | 0.611992657 | 0.100664765  |
| FDAMDD            | 0.878722727 | 0.92618525  | 0.959279895 | 0.976564288  |
| SkinSen           | 0.999423027 | 0.997296751 | 0.971316516 | 0.885920644  |
| Carcinogenicity   | 0.759638608 | 0.927610993 | 0.839057922 | 0.954525828  |
| EC                | 2.18E-11    | 3.22E-09    | 1.52E-09    | 2.19E-07     |
| EI                | 0.003794322 | 0.242738515 | 0.00649927  | 0.353414029  |
| Respiratory       | 0.999424815 | 0.997999966 | 0.981661201 | 0.940068185  |
| H-HT              | 0.730246782 | 0.957393587 | 0.792500019 | 0.968467832  |
| Neurotoxicity-DI  | 0.996783972 | 0.999698281 | 0.992272019 | 0.999281108  |
| Ototoxicity       | 0.618860006 | 0.977191687 | 0.510903001 | 0.964516878  |
| Hematotoxicity    | 0.771644533 | 0.944673061 | 0.571428835 | 0.870358348  |
| Nephrotoxicity-DI | 0.919334769 | 0.997553289 | 0.847280383 | 0.994819582  |
| Genotoxicity      | 0.996340156 | 1           | 0.99987042  | 1            |
| RPMI-8226         | 0.258406132 | 0.174673721 | 0.238864124 | 0.157971382  |
| A549              | 0.979188859 | 0.801273227 | 0.642495215 | 0.135120347  |

| Name                         | BT-PTZ-1                                               | BT-PTZ-2                                                 | BT-PTZO-1                                              | BT-PTZO-2                                                |
|------------------------------|--------------------------------------------------------|----------------------------------------------------------|--------------------------------------------------------|----------------------------------------------------------|
| HEK293                       | 0.998480499                                            | 0.999415994                                              | 0.984270394                                            | 0.993897736                                              |
| NR-AhR                       | 0.999437988                                            | 0.999715149                                              | 0.999381423                                            | 0.999614477                                              |
| NR-AR                        | 0.633356512                                            | 0.034468368                                              | 0.809978366                                            | 0.084733702                                              |
| NR-AR-LBD                    | 0.736457109                                            | 0.602147996                                              | 0.924707174                                            | 0.843703151                                              |
| NR-Aromatase                 | 0.88047272                                             | 0.949086547                                              | 0.67497015                                             | 0.818391204                                              |
| NR-ER                        | 0.874232026                                            | 0.989339411                                              | 0.815588236                                            | 0.982480943                                              |
| NR-ER-LBD                    | 0.008729187                                            | 0.424299031                                              | 0.002148574                                            | 0.126872644                                              |
| NR-PPAR-gamma                | 0.820520997                                            | 0.273231506                                              | 0.78676033                                             | 0.241994783                                              |
| SR-ARE                       | 0.991290092                                            | 0.999235868                                              | 0.988200784                                            | 0.99896121                                               |
| SR-ATAD5                     | 0.540379882                                            | 0.678446531                                              | 0.386974961                                            | 0.523831546                                              |
| SR-HSE                       | 0.836855471                                            | 0.955584586                                              | 0.38260895                                             | 0.720810235                                              |
| SR-MMP                       | 0.99975425                                             | 0.999985933                                              | 0.999475896                                            | 0.999961376                                              |
| SR-p53                       | 0.959701538                                            | 0.969572246                                              | 0.780841172                                            | 0.795073628                                              |
| NonBiodegradable             | ['-']                                                  | [(12,)]                                                  | ['-']                                                  | [(12,)]                                                  |
| NonGenotoxic_Carcinogenicity | ['-']                                                  | ['-']                                                    | ['-']                                                  | ['-']                                                    |
| SureChEMBL                   | ['-']                                                  | ['-']                                                    | ['-']                                                  | ['-']                                                    |
| LD50_oral                    | [(2, 3, 4, 5, 6, 7, 8, 9, 10, 11, 12, 13, 40, 41, 42)] | [(2, 3, 4, 5, 6, 7, 27, 28, 29, 30, 31, 32, 42, 43, 44)] | [(2, 3, 4, 5, 6, 7, 8, 9, 10, 11, 12, 13, 42, 43, 44)] | [(2, 3, 4, 5, 6, 7, 27, 28, 29, 32, 33, 34, 44, 45, 46)] |
| Skin_Sensitization           | [(23, 24, 25, 26, 27, 28, 29, 30, 31, 32)]             | [(32, 33, 34, 35, 36, 37, 38, 39, 40, 41)]               | [(25, 26, 27, 28, 29, 30, 31, 32, 33, 34)]             | [(34, 35, 36, 37, 38, 39, 40, 41, 42, 43)]               |
| Acute_Aquatic_Toxicity       | ['-']                                                  | ['-']                                                    | ['-']                                                  | ['-']                                                    |
| Toxicophores                 | [(3, 4, 5, 6, 7, 8, 9), (32, 31, 26, 25, 24)]          | [(3, 4, 5, 6, 7, 27, 28), (41, 40, 35, 34, 33)]          | [(3, 4, 5, 6, 7, 8, 9), (34, 33, 28, 27, 26)]          | [(3, 4, 5, 6, 7, 27, 28), (43, 42, 37, 36, 35)]          |
| Carcinogenicity_Mutagenicity | [(4, 3)]                                               | [(4, 3)]                                                 | [(4, 3)]                                               | [(4, 3)]                                                 |
| Aggregators                  | 1                                                      | 1                                                        | 1                                                      | 1                                                        |
| Fluc                         | 0.969                                                  | 0.902                                                    | 0.87                                                   | 0.796                                                    |
| Blue_fluorescence            | 0.98                                                   | 0.966                                                    | 0.904                                                  | 0.934                                                    |
| Green_fluorescence           | 0.999                                                  | 1                                                        | 0.999                                                  | 1                                                        |
| Reactive                     | 0.541                                                  | 0.228                                                    | 0.195                                                  | 0.049                                                    |
| Other_assay_interference     | 0.906                                                  | 0.697                                                    | 0.88                                                   | 0.677                                                    |
| Promiscuous                  | 0.453                                                  | 0.097                                                    | 0.053                                                  | 0.004                                                    |

**Table S6:** Toxicity of the compounds predicted using the ProTox-III

| Parameters                                 |                                                                                       | BT-PTZ-1   |             | BT-PTZ-2   |             | BT-PTZO-1  |             | BT-PTZO-2  |             |
|--------------------------------------------|---------------------------------------------------------------------------------------|------------|-------------|------------|-------------|------------|-------------|------------|-------------|
| Classification                             | Target                                                                                | Prediction | Probability | Prediction | Probability | Prediction | Probability | Prediction | Probability |
| Organ toxicity                             | Hepatotoxicity                                                                        | Inactive   | 0.56        | Inactive   | 0.56        | Inactive   | 0.62        | Inactive   | 0.58        |
| Organ toxicity                             | Neurotoxicity                                                                         | Active     | 0.81        | Active     | 0.78        | Active     | 0.62        | Active     | 0.57        |
| Organ toxicity                             | Nephrotoxicity                                                                        | Inactive   | 0.82        | Inactive   | 0.83        | Inactive   | 0.62        | Inactive   | 0.62        |
| Organ toxicity                             | Respiratory toxicity                                                                  | Active     | 0.84        | Active     | 0.84        | Active     | 0.79        | Active     | 0.8         |
| Organ toxicity                             | Cardiotoxicity                                                                        | Inactive   | 0.93        | Inactive   | 0.92        | Inactive   | 0.82        | Inactive   | 0.81        |
| Toxicity end points                        | Carcinogenicity                                                                       | Inactive   | 0.76        | Inactive   | 0.69        | Inactive   | 0.65        | Inactive   | 0.61        |
| Toxicity end points                        | Immunotoxicity                                                                        | Inactive   | 0.86        | Inactive   | 0.88        | Inactive   | 0.97        | Inactive   | 0.99        |
| Toxicity end points                        | Mutagenicity                                                                          | Inactive   | 0.57        | Active     | 0.51        | Inactive   | 0.56        | Inactive   | 0.53        |
| Toxicity end points                        | Cytotoxicity                                                                          | Inactive   | 0.62        | Inactive   | 0.65        | Inactive   | 0.56        | Inactive   | 0.57        |
| Toxicity end points                        | BBB-barrier                                                                           | Active     | 0.92        | Active     | 0.91        | Active     | 0.92        | Active     | 0.9         |
| Toxicity end points                        | Ecotoxicity                                                                           | Active     | 0.77        | Active     | 0.76        | Inactive   | 0.56        | Inactive   | 0.58        |
| Toxicity end points                        | Clinical toxicity                                                                     | Inactive   | 0.52        | Active     | 0.55        | Active     | 0.54        | Active     | 0.61        |
| Toxicity end points                        | Nutritional toxicity                                                                  | Inactive   | 0.73        | Inactive   | 0.71        | Inactive   | 0.67        | Inactive   | 0.66        |
| Tox21-Nuclear receptor signalling pathways | Aryl hydrocarbon Receptor (AhR)                                                       | Inactive   | 0.75        | Inactive   | 0.6         | Inactive   | 0.83        | Inactive   | 0.82        |
| Tox21-Nuclear receptor signalling pathways | Androgen Receptor (AR)                                                                | Inactive   | 0.9         | Inactive   | 0.9         | Inactive   | 0.95        | Inactive   | 0.95        |
| Tox21-Nuclear receptor signalling pathways | Androgen Receptor Ligand Binding Domain (AR-LBD)                                      | Inactive   | 0.93        | Inactive   | 0.92        | Inactive   | 0.95        | Inactive   | 0.94        |
| Tox21-Nuclear receptor signalling pathways | Aromatase                                                                             | Inactive   | 0.85        | Inactive   | 0.85        | Inactive   | 0.93        | Inactive   | 0.91        |
| Tox21-Nuclear receptor signalling pathways | Estrogen Receptor Alpha (ER)                                                          | Inactive   | 0.88        | Inactive   | 0.83        | Inactive   | 0.87        | Inactive   | 0.86        |
| Tox21-Nuclear receptor signalling pathways | Estrogen Receptor Ligand Binding Domain (ER-LBD)                                      | Inactive   | 0.96        | Inactive   | 0.95        | Inactive   | 0.93        | Inactive   | 0.92        |
| Tox21-Nuclear receptor signalling pathways | Peroxisome Proliferator Activated Receptor Gamma (PPAR-Gamma)                         | Inactive   | 0.92        | Inactive   | 0.91        | Inactive   | 0.94        | Inactive   | 0.93        |
| Tox21-Stress response pathways             | Nuclear factor (erythroid-derived 2)-like 2/antioxidant responsive element (nrf2/ARE) | Inactive   | 0.93        | Inactive   | 0.93        | Inactive   | 0.93        | Inactive   | 0.93        |
| Tox21-Stress response pathways             | Heat shock factor response element (HSE)                                              | Inactive   | 0.93        | Inactive   | 0.93        | Inactive   | 0.93        | Inactive   | 0.93        |
| Tox21-Stress response pathways             | Mitochondrial Membrane Potential (MMP)                                                | Inactive   | 0.69        | Inactive   | 0.66        | Inactive   | 0.77        | Inactive   | 0.76        |
| Tox21-Stress response pathways             | Phosphoprotein (Tumor Suppressor) p53                                                 | Inactive   | 0.77        | Inactive   | 0.75        | Inactive   | 0.9         | Inactive   | 0.89        |
| Tox21-Stress response pathways             | ATPase family AAA domain-containing protein 5                                         | Inactive   | 0.9         | Inactive   | 0.83        | Inactive   | 0.92        | Inactive   | 0.86        |

| Parameters                  |                                                                      | BT-PTZ-1   |             | BT-PTZ-2   |             | BT-PTZO-1  |             | BT-PTZO-2  |             |
|-----------------------------|----------------------------------------------------------------------|------------|-------------|------------|-------------|------------|-------------|------------|-------------|
| Classification              | Target                                                               | Prediction | Probability | Prediction | Probability | Prediction | Probability | Prediction | Probability |
|                             | (ATAD5)                                                              |            |             |            |             |            |             |            |             |
| Molecular Initiating Events | Thyroid hormone receptor alpha (THR $\alpha$ )                       | Inactive   | 0.9         | Inactive   | 0.9         | Inactive   | 0.9         | Inactive   | 0.9         |
| Molecular Initiating Events | Thyroid hormone receptor beta (THR $\beta$ )                         | Inactive   | 0.78        | Inactive   | 0.78        | Inactive   | 0.78        | Inactive   | 0.78        |
| Molecular Initiating Events | Transthyretin (TTR)                                                  | Inactive   | 0.97        | Inactive   | 0.97        | Inactive   | 0.97        | Inactive   | 0.97        |
| Molecular Initiating Events | Ryanodine receptor (RYR)                                             | Inactive   | 0.98        | Inactive   | 0.98        | Inactive   | 0.98        | Inactive   | 0.98        |
| Molecular Initiating Events | GABA receptor (GABAR)                                                | Inactive   | 0.96        | Inactive   | 0.96        | Inactive   | 0.96        | Inactive   | 0.96        |
| Molecular Initiating Events | Glutamate N-methyl-D-aspartate receptor (NMDAR)                      | Inactive   | 0.92        | Inactive   | 0.92        | Inactive   | 0.92        | Inactive   | 0.92        |
| Molecular Initiating Events | alpha-amino-3-hydroxy-5-methyl-4-isoxazolepropionate receptor (AMPA) | Inactive   | 0.97        | Inactive   | 0.97        | Inactive   | 0.97        | Inactive   | 0.97        |
| Molecular Initiating Events | Kainate receptor (KAR)                                               | Inactive   | 0.99        | Inactive   | 0.99        | Inactive   | 0.99        | Inactive   | 0.99        |
| Molecular Initiating Events | Achetylcholinesterase (AChE)                                         | Inactive   | 0.56        | Inactive   | 0.56        | Inactive   | 0.62        | Inactive   | 0.58        |
| Molecular Initiating Events | Constitutive androstane receptor (CAR)                               | Inactive   | 0.98        | Inactive   | 0.98        | Inactive   | 0.98        | Inactive   | 0.98        |
| Molecular Initiating Events | Pregnane X receptor (PXR)                                            | Inactive   | 0.92        | Inactive   | 0.92        | Inactive   | 0.92        | Inactive   | 0.92        |
| Molecular Initiating Events | NADH-quinone oxidoreductase (NADHox)                                 | Inactive   | 0.97        | Inactive   | 0.97        | Inactive   | 0.97        | Inactive   | 0.97        |
| Molecular Initiating Events | Voltage gated sodium channel (VGSC)                                  | Inactive   | 0.95        | Inactive   | 0.95        | Inactive   | 0.95        | Inactive   | 0.95        |
| Molecular Initiating Events | Na <sup>+</sup> /I <sup>-</sup> symporter (NIS)                      | Inactive   | 0.98        | Inactive   | 0.98        | Inactive   | 0.98        | Inactive   | 0.98        |
| Metabolism                  | Cytochrome CYP1A2                                                    | Active     | 0.52        | Active     | 0.53        | Inactive   | 0.67        | Inactive   | 0.65        |
| Metabolism                  | Cytochrome CYP2C19                                                   | Inactive   | 0.58        | Active     | 0.51        | Inactive   | 0.54        | Active     | 0.5         |
| Metabolism                  | Cytochrome CYP2C9                                                    | Inactive   | 0.5         | Inactive   | 0.5         | Active     | 0.57        | Active     | 0.61        |
| Metabolism                  | Cytochrome CYP2D6                                                    | Active     | 0.85        | Active     | 0.83        | Active     | 0.61        | Active     | 0.57        |
| Metabolism                  | Cytochrome CYP3A4                                                    | Inactive   | 0.72        | Inactive   | 0.65        | Inactive   | 0.6         | Inactive   | 0.54        |
| Metabolism                  | Cytochrome CYP2E1                                                    | Inactive   | 0.95        | Inactive   | 0.96        | Inactive   | 0.99        | Inactive   | 0.99        |



**Table S7 SuperPRED target prediction of probable macromolecular targets for compounds**

**A) BT-PTZ-1**

| <b>BT-PTZ-1</b>                                               |                  |                   |                          |               |                    |                       |
|---------------------------------------------------------------|------------------|-------------------|--------------------------|---------------|--------------------|-----------------------|
| <b>Target Name</b>                                            | <b>ChEMBL-ID</b> | <b>UniProt ID</b> | <b>PDB Visualization</b> | <b>TTD ID</b> | <b>Probability</b> | <b>Model accuracy</b> |
| Cathepsin D                                                   | CHEMBL2581       | P07339            | 4OD9                     | T67102        | 0.9905             | 0.9895                |
| Kruppel-like factor 5                                         | CHEMBL1293249    | Q13887            | Not Available            | Not Available | 0.9793             | 0.8633                |
| Nuclear factor NF-kappa-B p105 subunit                        | CHEMBL3251       | P19838            | 1SVC                     | Not Available | 0.9689             | 0.9609                |
| Tyrosyl-DNA phosphodiesterase 1                               | CHEMBL1075138    | Q9NUW8            | 6N0D                     | Not Available | 0.9655             | 0.7122                |
| Cyclooxygenase-2                                              | CHEMBL230        | P35354            | 5F19                     | Not Available | 0.9496             | 0.8963                |
| Cyclooxygenase-1                                              | CHEMBL221        | P23219            | 6Y3C                     | Not Available | 0.9354             | 0.9017                |
| Beta amyloid A4 protein                                       | CHEMBL2487       | P05067            | 5BUO                     | T87024        | 0.9299             | 0.9674                |
| G-protein coupled bile acid receptor 1                        | CHEMBL5409       | Q8TDU6            | 7CFM                     | T86273        | 0.9134             | 0.9365                |
| Hypoxia-inducible factor 1 alpha                              | CHEMBL4261       | Q16665            | 4H6J                     | Not Available | 0.8982             | 0.8514                |
| Dual specificity protein kinase CLK1                          | CHEMBL4224       | P49759            | 6KHD                     | Not Available | 0.8979             | 0.853                 |
| Geranylgeranyl pyrophosphate synthetase                       | CHEMBL4769       | O95749            | 6R4V                     | Not Available | 0.8745             | 0.9208                |
| DCN1-like protein 1                                           | CHEMBL4105838    | Q96GG9            | 6BG3                     | Not Available | 0.8621             | 0.95                  |
| Dual specificity protein phosphatase 3                        | CHEMBL2635       | P51452            | 3F81                     | Not Available | 0.8571             | 0.94                  |
| Transmembrane protease serine 6                               | CHEMBL1795139    | Q8IU80            | Not Available            | Not Available | 0.8473             | 0.9833                |
| Casein kinase I delta                                         | CHEMBL2828       | P48730            | 6PXN                     | Not Available | 0.8437             | 0.9308                |
| Anandamide amidohydrolase                                     | CHEMBL2243       | O00519            | Not Available            | T11754        | 0.8424             | 0.9753                |
| Nuclear receptor ROR-beta                                     | CHEMBL3091268    | Q92753            | Not Available            | Not Available | 0.8393             | 0.955                 |
| Dual-specificity tyrosine-phosphorylation regulated kinase 1A | CHEMBL2292       | Q13627            | 6S14                     | T92803        | 0.8318             | 0.9324                |
| Aminopeptidase N                                              | CHEMBL1907       | P15144            | 4FYT                     | T67272        | 0.8305             | 0.9331                |
| Signal transducer and activator of transcription 1-alpha/beta | CHEMBL6101       | P42224            | 1YVL                     | T64205        | 0.8263             | 0.7262                |
| Aldose reductase                                              | CHEMBL1900       | P15121            | 1US0                     | T26623        | 0.8196             | 0.9238                |
| DNA topoisomerase I                                           | CHEMBL1781       | P11387            | 1K4T                     | T09826        | 0.8157             | 0.97                  |
| Ras-related protein Rab-9A                                    | CHEMBL1293294    | P51151            | 1WMS                     | T66350        | 0.8123             | 0.8767                |
| Cytochrome P450 2A6                                           | CHEMBL5282       | P11509            | 2FDV                     | T06455        | 0.8123             | 0.7178                |
| Nuclear factor erythroid 2-related factor 2                   | CHEMBL1075094    | Q16236            | 2FLU                     | Not Available | 0.8083             | 0.96                  |
| GABA-A receptor; alpha-1/beta-3/gamma-2                       | CHEMBL2094121    | P14867            | 6HUJ                     | T51487        | 0.8003             | 0.955                 |

**B) BT-PTZ-2**

| <b>BT-PTZ-2</b>                                               |                  |                   |                          |               |                    |                       |
|---------------------------------------------------------------|------------------|-------------------|--------------------------|---------------|--------------------|-----------------------|
| <b>Target Name</b>                                            | <b>ChEMBL-ID</b> | <b>UniProt ID</b> | <b>PDB Visualization</b> | <b>TTD ID</b> | <b>Probability</b> | <b>Model accuracy</b> |
| Cathepsin D                                                   | CHEMBL2581       | P07339            | 4OD9                     | T67102        | 0.9948             | 0.9895                |
| Kruppel-like factor 5                                         | CHEMBL1293249    | Q13887            | Not Available            | Not Available | 0.9825             | 0.8633                |
| Nuclear factor NF-kappa-B p105 subunit                        | CHEMBL3251       | P19838            | 1SVC                     | Not Available | 0.9743             | 0.9609                |
| Beta amyloid A4 protein                                       | CHEMBL2487       | P05067            | 5BUO                     | T87024        | 0.9718             | 0.9674                |
| Tyrosyl-DNA phosphodiesterase 1                               | CHEMBL1075138    | Q9NUW8            | 6N0D                     | Not Available | 0.9669             | 0.7122                |
| Protein-tyrosine phosphatase 1B                               | CHEMBL335        | P18031            | 5QGF                     | Not Available | 0.9575             | 0.9517                |
| Cyclooxygenase-1                                              | CHEMBL221        | P23219            | 6Y3C                     | Not Available | 0.9361             | 0.9017                |
| Ras-related protein Rab-9A                                    | CHEMBL1293294    | P51151            | 1WMS                     | T66350        | 0.9284             | 0.8767                |
| HERG                                                          | CHEMBL240        | Q12809            | 5VA1                     | T20251        | 0.9183             | 0.8976                |
| Geranylgeranyl pyrophosphate synthetase                       | CHEMBL4769       | O95749            | 6R4V                     | Not Available | 0.8905             | 0.9208                |
| 15-hydroxyprostaglandin dehydrogenase [NAD+]                  | CHEMBL1293255    | P15428            | 2GDZ                     | Not Available | 0.8866             | 0.8357                |
| Choline kinase alpha                                          | CHEMBL3117       | P35790            | 4DA5                     | T55709        | 0.8728             | 0.78                  |
| Glyoxalase I                                                  | CHEMBL2424       | Q04760            | 3W0T                     | Not Available | 0.8722             | 0.9167                |
| Muscarinic acetylcholine receptor M5                          | CHEMBL2035       | P08912            | 6OL9                     | T79961        | 0.8688             | 0.9462                |
| DCN1-like protein 1                                           | CHEMBL4105838    | Q96GG9            | 6BG3                     | Not Available | 0.8589             | 0.95                  |
| DNA topoisomerase I                                           | CHEMBL1781       | P11387            | 1K4T                     | T09826        | 0.8482             | 0.97                  |
| Monoamine oxidase A                                           | CHEMBL1951       | P21397            | 2Z5Y                     | Not Available | 0.8436             | 0.9149                |
| Calpain 1                                                     | CHEMBL3891       | P07384            | 1ZCM                     | Not Available | 0.8416             | 0.9304                |
| Nuclear receptor ROR-beta                                     | CHEMBL3091268    | Q92753            | Not Available            | Not Available | 0.8411             | 0.955                 |
| Pregnane X receptor                                           | CHEMBL3401       | O75469            | 6TFI                     | T82702        | 0.8366             | 0.9473                |
| Aminopeptidase N                                              | CHEMBL1907       | P15144            | 4FYT                     | T67272        | 0.8336             | 0.9331                |
| G-protein coupled bile acid receptor 1                        | CHEMBL5409       | Q8TDU6            | 7CFM                     | T86273        | 0.8294             | 0.9365                |
| Aldose reductase                                              | CHEMBL1900       | P15121            | 1US0                     | T26623        | 0.8291             | 0.9238                |
| Nuclear factor erythroid 2-related factor 2                   | CHEMBL1075094    | Q16236            | 2FLU                     | Not Available | 0.8242             | 0.96                  |
| Signal transducer and activator of transcription 1-alpha/beta | CHEMBL6101       | P42224            | 1YVL                     | T64205        | 0.822              | 0.7262                |
| Transmembrane protease serine 6                               | CHEMBL1795139    | Q8IU80            | Not Available            | Not Available | 0.8169             | 0.9833                |
| Dual specificity protein phosphatase 3                        | CHEMBL2635       | P51452            | 3F81                     | Not Available | 0.8118             | 0.94                  |

C) BT-PTZO-1

| BT-PTZO-1                                                     |               |            |                   |               |             |                |
|---------------------------------------------------------------|---------------|------------|-------------------|---------------|-------------|----------------|
| Target Name                                                   | ChEMBL-ID     | UniProt ID | PDB Visualization | TTD ID        | Probability | Model accuracy |
| Cathepsin D                                                   | CHEMBL2581    | P07339     | 4OD9              | T67102        | 0.9934      | 0.9895         |
| Nuclear factor NF-kappa-B p105 subunit                        | CHEMBL3251    | P19838     | 1SVC              | Not Available | 0.9691      | 0.9609         |
| Kruppel-like factor 5                                         | CHEMBL1293249 | Q13887     | Not Available     | Not Available | 0.9595      | 0.8633         |
| Tyrosyl-DNA phosphodiesterase 1                               | CHEMBL1075138 | Q9NUW8     | 6N0D              | Not Available | 0.9213      | 0.7122         |
| G-protein coupled bile acid receptor 1                        | CHEMBL5409    | Q8TDU6     | 7CFM              | T86273        | 0.9186      | 0.9365         |
| Hypoxia-inducible factor 1 alpha                              | CHEMBL4261    | Q16665     | 4H6J              | Not Available | 0.9182      | 0.8514         |
| Nuclear factor erythroid 2-related factor 2                   | CHEMBL1075094 | Q16236     | 2FLU              | Not Available | 0.8876      | 0.96           |
| Cyclooxygenase-2                                              | CHEMBL230     | P35354     | 5F19              | Not Available | 0.8814      | 0.8963         |
| Dual specificity protein phosphatase 3                        | CHEMBL2635    | P51452     | 3F81              | Not Available | 0.8732      | 0.94           |
| Cyclooxygenase-1                                              | CHEMBL221     | P23219     | 6Y3C              | Not Available | 0.8681      | 0.9017         |
| 15-hydroxyprostaglandin dehydrogenase [NAD+]                  | CHEMBL1293255 | P15428     | 2GDZ              | Not Available | 0.8638      | 0.8357         |
| Cytochrome P450 2A6                                           | CHEMBL5282    | P11509     | 2FDV              | T06455        | 0.8597      | 0.7178         |
| Beta amyloid A4 protein                                       | CHEMBL2487    | P05067     | 5BUO              | T87024        | 0.8515      | 0.9674         |
| Signal transducer and activator of transcription 1-alpha/beta | CHEMBL6101    | P42224     | 1YVL              | T64205        | 0.8498      | 0.7262         |
| DCN1-like protein 1                                           | CHEMBL4105838 | Q96GG9     | 6BG3              | Not Available | 0.8471      | 0.95           |
| Anandamide amidohydrolase                                     | CHEMBL2243    | O00519     | Not Available     | T11754        | 0.8435      | 0.9753         |
| Butyrylcholinesterase                                         | CHEMBL1914    | P06276     | 5LKR              | T99799        | 0.8399      | 0.95           |
| Dual specificity protein kinase CLK1                          | CHEMBL4224    | P49759     | 6KHD              | Not Available | 0.8388      | 0.853          |
| Transmembrane protease serine 6                               | CHEMBL1795139 | Q8IU80     | Not Available     | Not Available | 0.8351      | 0.9833         |
| Aminopeptidase N                                              | CHEMBL1907    | P15144     | 4FYT              | T67272        | 0.8341      | 0.9331         |
| Ras-related protein Rab-9A                                    | CHEMBL1293294 | P51151     | 1WMS              | T66350        | 0.828       | 0.8767         |
| Aldose reductase                                              | CHEMBL1900    | P15121     | 1US0              | T26623        | 0.8278      | 0.9238         |
| DNA topoisomerase I                                           | CHEMBL1781    | P11387     | 1K4T              | T09826        | 0.8267      | 0.97           |
| Geranylgeranyl pyrophosphate synthetase                       | CHEMBL4769    | O95749     | 6R4V              | Not Available | 0.8195      | 0.9208         |
| Proteasome component C5                                       | CHEMBL4208    | P20618     | 6KWY              | Not Available | 0.8147      | 0.9            |
| Calpain 1                                                     | CHEMBL3891    | P07384     | 1ZCM              | Not Available | 0.8068      | 0.9304         |

**D) BT-PTZO-2**

| <b>BT-PTZO-2</b>                                              |                  |                   |                          |               |                    |                       |
|---------------------------------------------------------------|------------------|-------------------|--------------------------|---------------|--------------------|-----------------------|
| <b>Target Name</b>                                            | <b>ChEMBL-ID</b> | <b>UniProt ID</b> | <b>PDB Visualization</b> | <b>TTD ID</b> | <b>Probability</b> | <b>Model accuracy</b> |
| Cathepsin D                                                   | CHEMBL2581       | P07339            | 4OD9                     | T67102        | 0.996              | 0.9895                |
| Nuclear factor NF-kappa-B p105 subunit                        | CHEMBL3251       | P19838            | 1SVC                     | Not Available | 0.9746             | 0.9609                |
| Ras-related protein Rab-9A                                    | CHEMBL1293294    | P51151            | 1WMS                     | T66350        | 0.9718             | 0.8767                |
| Kruppel-like factor 5                                         | CHEMBL1293249    | Q13887            | Not Available            | Not Available | 0.9637             | 0.8633                |
| Beta amyloid A4 protein                                       | CHEMBL2487       | P05067            | 5BUO                     | T87024        | 0.9539             | 0.9674                |
| HERG                                                          | CHEMBL240        | Q12809            | 5VA1                     | T20251        | 0.9057             | 0.8976                |
| Nuclear factor erythroid 2-related factor 2                   | CHEMBL1075094    | Q16236            | 2FLU                     | Not Available | 0.9018             | 0.96                  |
| Niemann-Pick C1 protein                                       | CHEMBL1293277    | O15118            | 6W5S                     | Not Available | 0.8952             | 0.8111                |
| Tyrosyl-DNA phosphodiesterase 1                               | CHEMBL1075138    | Q9NUW8            | 6N0D                     | Not Available | 0.8949             | 0.7122                |
| Calpain 1                                                     | CHEMBL3891       | P07384            | 1ZCM                     | Not Available | 0.8788             | 0.9304                |
| 15-hydroxyprostaglandin dehydrogenase [NAD <sup>+</sup> ]     | CHEMBL1293255    | P15428            | 2GDZ                     | Not Available | 0.8712             | 0.8357                |
| Choline kinase alpha                                          | CHEMBL3117       | P35790            | 4DA5                     | T55709        | 0.8689             | 0.78                  |
| Monoamine oxidase A                                           | CHEMBL1951       | P21397            | 2Z5Y                     | Not Available | 0.8667             | 0.9149                |
| DNA topoisomerase I                                           | CHEMBL1781       | P11387            | 1K4T                     | T09826        | 0.8621             | 0.97                  |
| Dual specificity protein phosphatase 3                        | CHEMBL2635       | P51452            | 3F81                     | Not Available | 0.8522             | 0.94                  |
| T-cell protein-tyrosine phosphatase                           | CHEMBL3807       | P17706            | 1L8K                     | Not Available | 0.8511             | 0.93                  |
| Signal transducer and activator of transcription 1-alpha/beta | CHEMBL6101       | P42224            | 1YVL                     | T64205        | 0.8435             | 0.7262                |
| Geranylgeranyl pyrophosphate synthetase                       | CHEMBL4769       | O95749            | 6R4V                     | Not Available | 0.8412             | 0.9208                |
| G-protein coupled bile acid receptor 1                        | CHEMBL5409       | Q8TDU6            | 7CFM                     | T86273        | 0.838              | 0.9365                |
| DCN1-like protein 1                                           | CHEMBL4105838    | Q96GG9            | 6BG3                     | Not Available | 0.8364             | 0.95                  |
| Aminopeptidase N                                              | CHEMBL1907       | P15144            | 4FYT                     | T67272        | 0.8269             | 0.9331                |
| Pregnane X receptor                                           | CHEMBL3401       | O75469            | 6TFI                     | T82702        | 0.8242             | 0.9473                |
| Glycine transporter 2                                         | CHEMBL3060       | Q9Y345            | Not Available            | Not Available | 0.8242             | 0.9917                |
| Protein-tyrosine phosphatase 1B                               | CHEMBL335        | P18031            | 5QGF                     | Not Available | 0.8202             | 0.9517                |
| Transcription intermediary factor 1-alpha                     | CHEMBL3108638    | O15164            | 4YBM                     | Not Available | 0.81               | 0.9556                |
| Cytochrome P450 2A6                                           | CHEMBL5282       | P11509            | 2FDV                     | T06455        | 0.8036             | 0.7178                |
| Transmembrane protease serine 6                               | CHEMBL1795139    | Q8IU80            | Not Available            | Not Available | 0.803              | 0.9833                |

**Table S8** Primer sequence for qRT-PCR

| Gene         | Primers                    |
|--------------|----------------------------|
| <i>drp1</i>  | F- TGGGCGCCGACATCA         |
|              | R- GCTCTGCGTTCCCACTACGA    |
| <i>fis1</i>  | F- TACGTCCGCGGGTTGCT       |
|              | R- CCAGTTCCTTGGCCTGGTT     |
| <i>mff</i>   | F- CCAAACGCTGACCTGGAAC     |
|              | R- TTCCTGCTACAACAATCCTCTCC |
| <i>mfn1</i>  | F- GGCATCTGTGGCCGAGTT      |
|              | R- ATTATGCTAAGTCTCCGCTCCAA |
| <i>opa1</i>  | F- GTGCTGCCCCGCTAGAAA      |
|              | R- TGACAGGCACCCGTA CT CAGT |
| <i>apaf1</i> | F- CTGCTGCCCTTCTCCATGA     |
|              | R- TTGCGAAGCATCAGAATGCG    |
| <i>fadd</i>  | F- CACCAAGATCGACAGCATCG    |
|              | R- AGATTCTCAGTGACTCCCGC    |
| <i>gapdh</i> | F- TGCACCACCAACTGCTTAG     |
|              | R- GATGCAGGGATGATGTTTC     |

**Table S9** The drug vs. normalized response data were fitted using a four-parameter logistic (4PL) nonlinear regression model to estimate the IC<sub>50</sub> value.

| Cell Line | Compound         | Conc. (μM) |
|-----------|------------------|------------|
| A549      | <b>BT-PTZ-1</b>  | 166.8 μM   |
| A549      | <b>BT-PTZ-2</b>  | 136.6 μM   |
| A549      | <b>BT-PTZO-1</b> | 157.8 μM   |
| A549      | <b>BT-PTZO-2</b> | 115.9 μM   |
| HEK       | <b>BT-PTZ-1</b>  | 163.2 μM   |
| HEK       | <b>BT-PTZ-2</b>  | 87.14 μM   |
| HEK       | <b>BT-PTZO-1</b> | 88.5 μM    |
| HEK       | <b>BT-PTZO-2</b> | 54.45 μM   |

# Copies of NMR and HRMS spectra of new compounds

## <sup>1</sup>H NMR and <sup>13</sup>C NMR of BT-PTZ-1

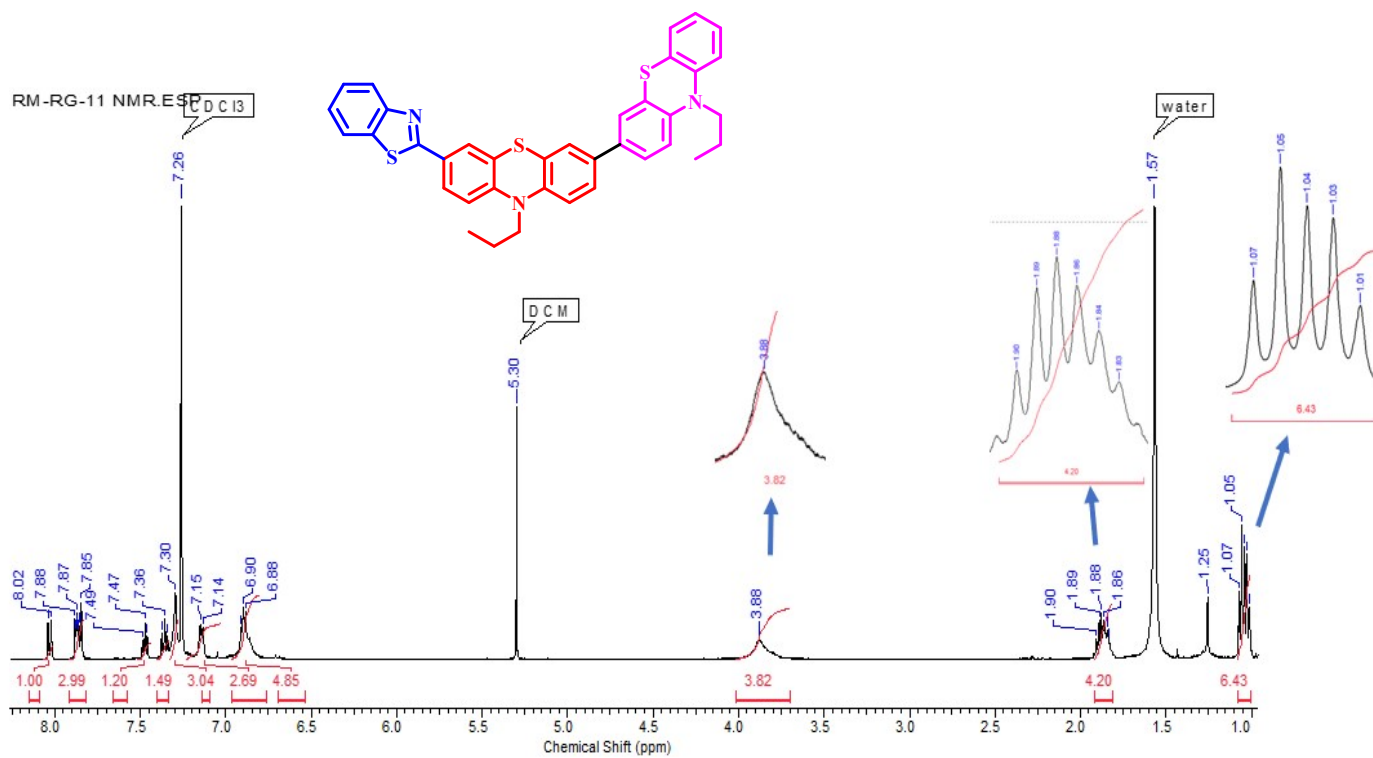

RM-RG-11 C.ESP

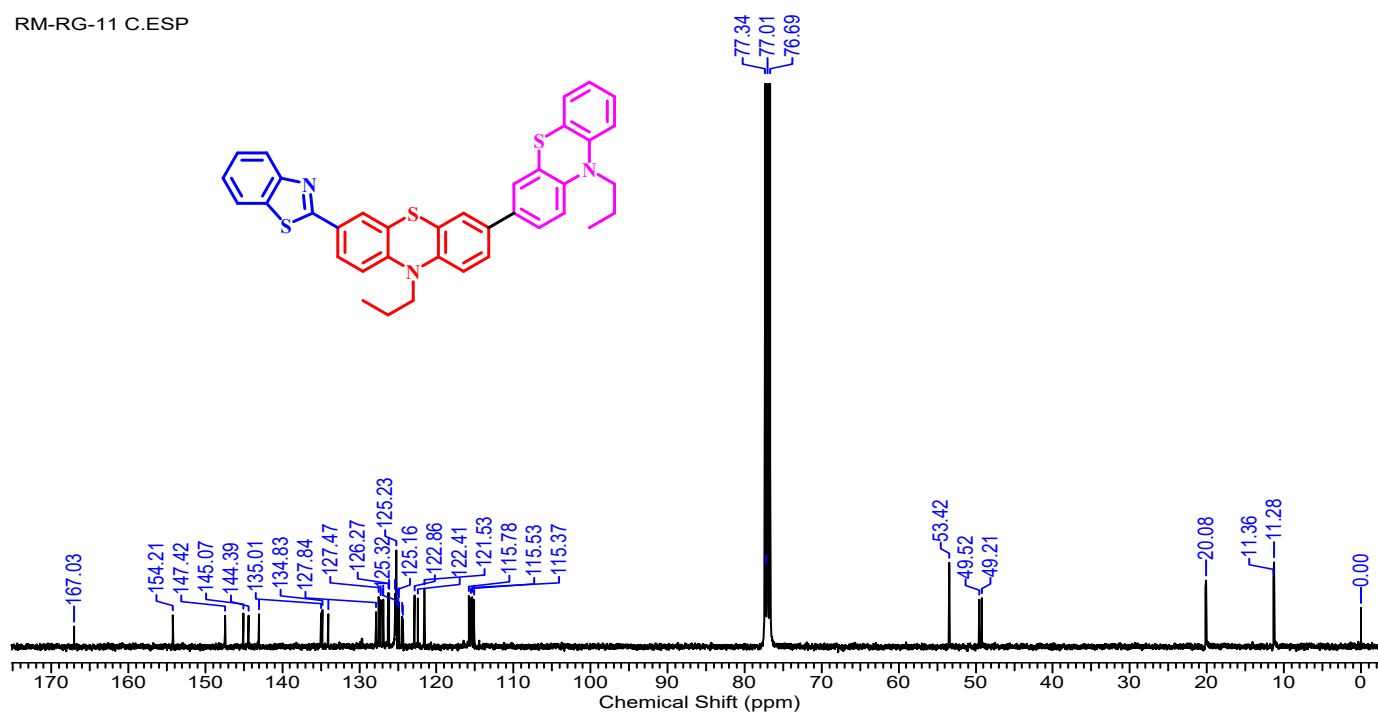

$^1\text{H}$  NMR and  $^{13}\text{C}$  NMR of BT-PTZ-2

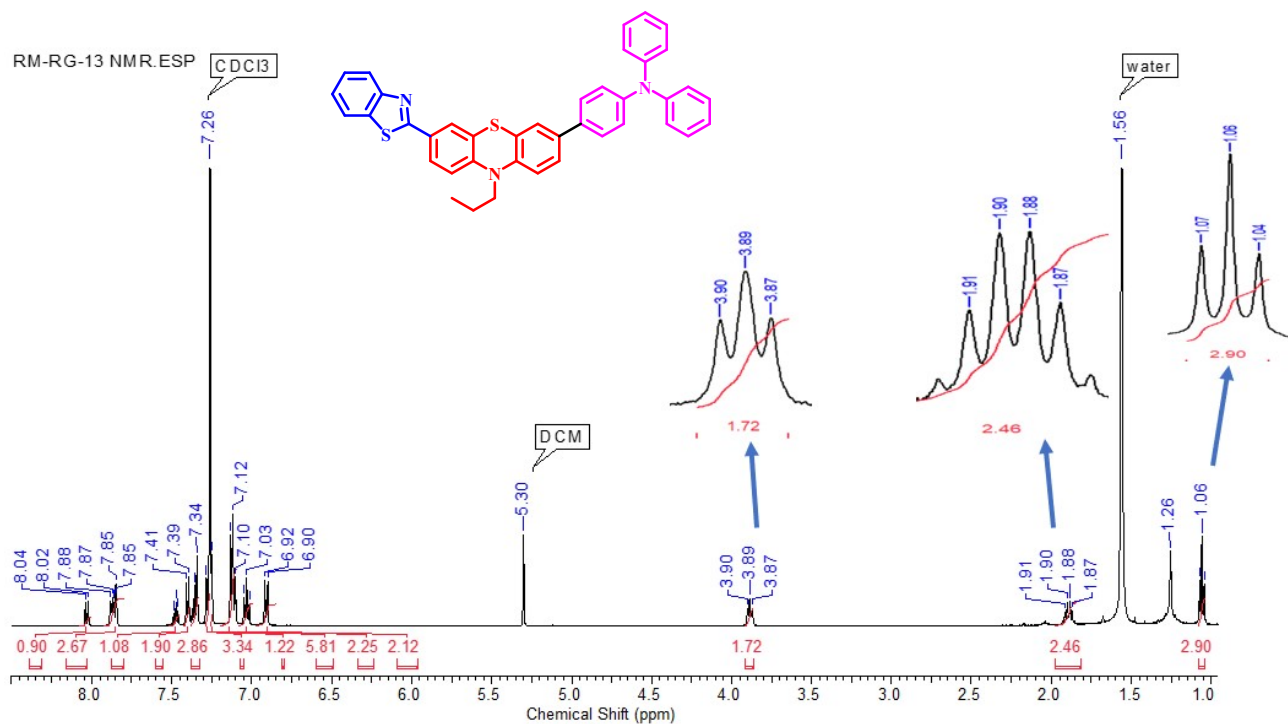

RM-RG-13 C13.ESP

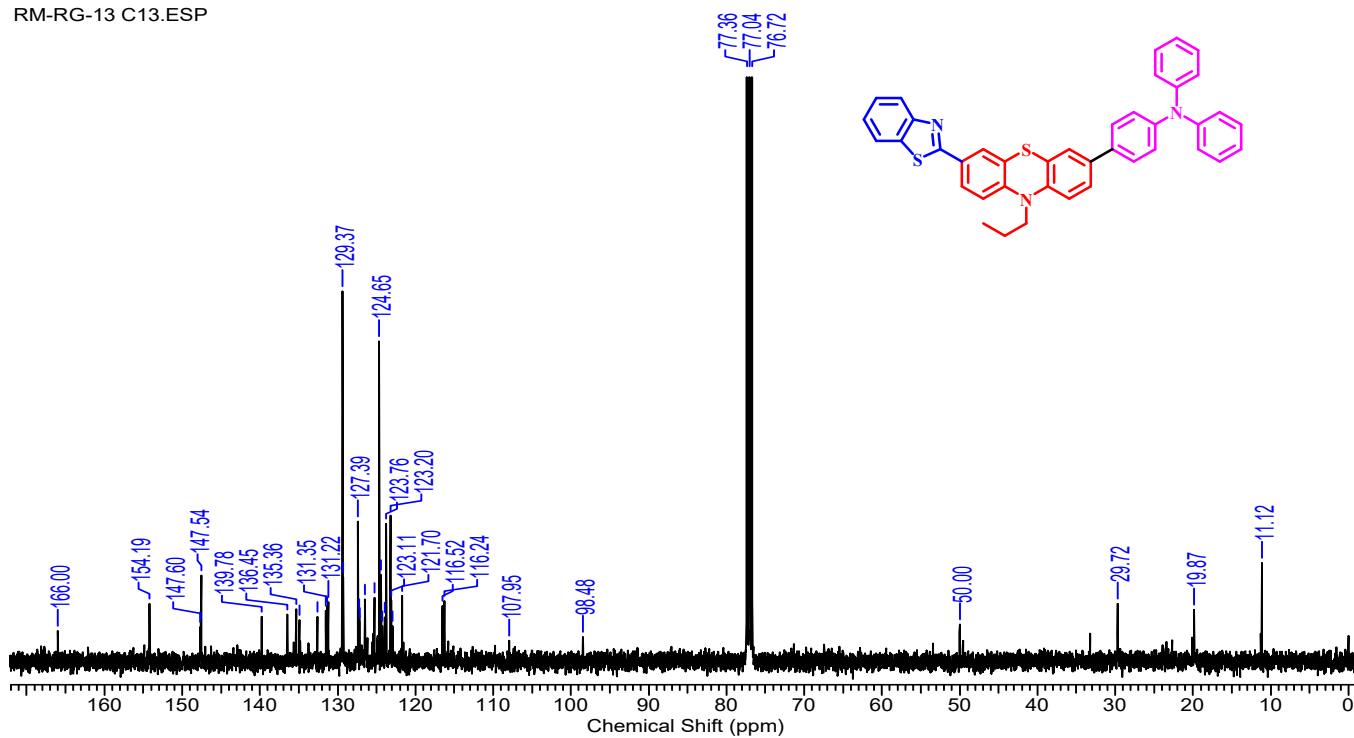

# <sup>1</sup>H NMR and <sup>13</sup>C NMR of BT-PTZO-1

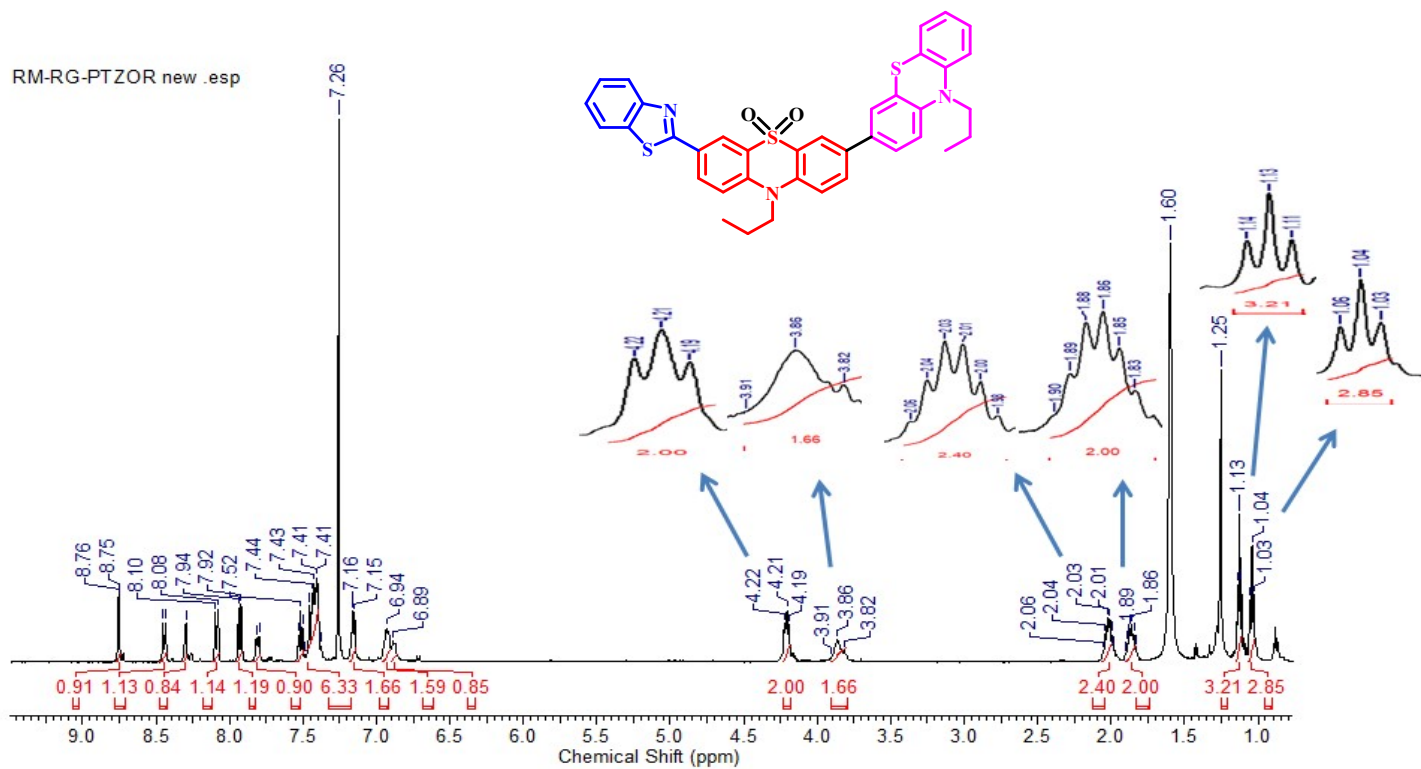

RM-PG-24C.ESP

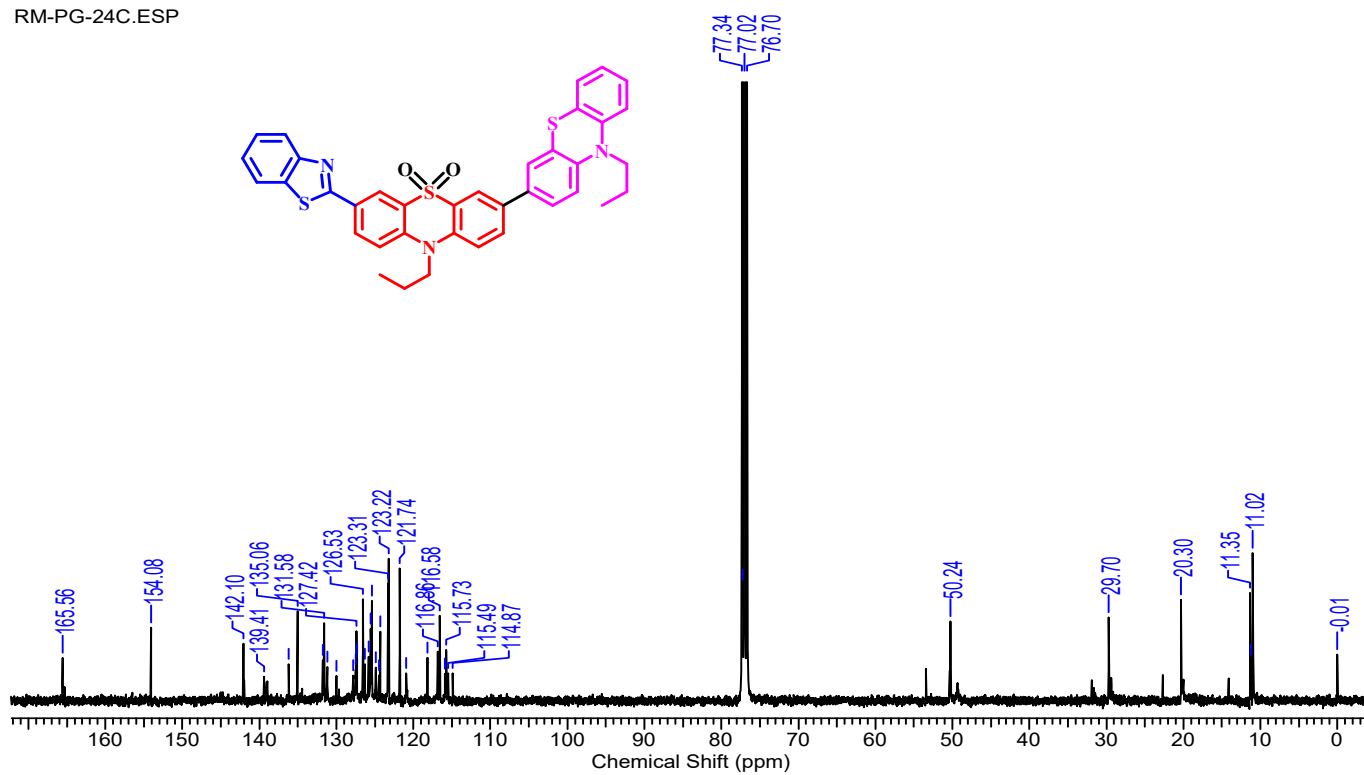



$^1\text{H}$  NMR and  $^{13}\text{C}$  NMR of BT-PTZO-2

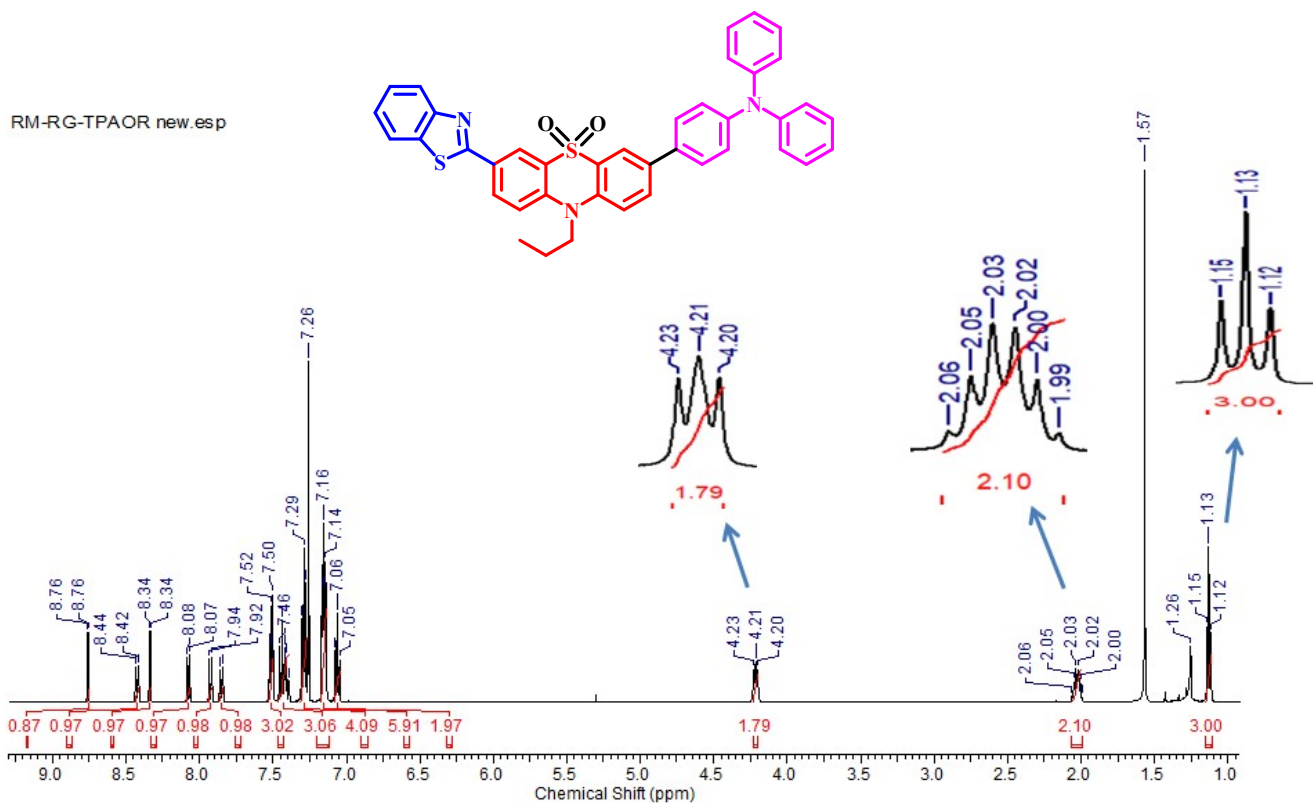

RM-PG-23C.ESP

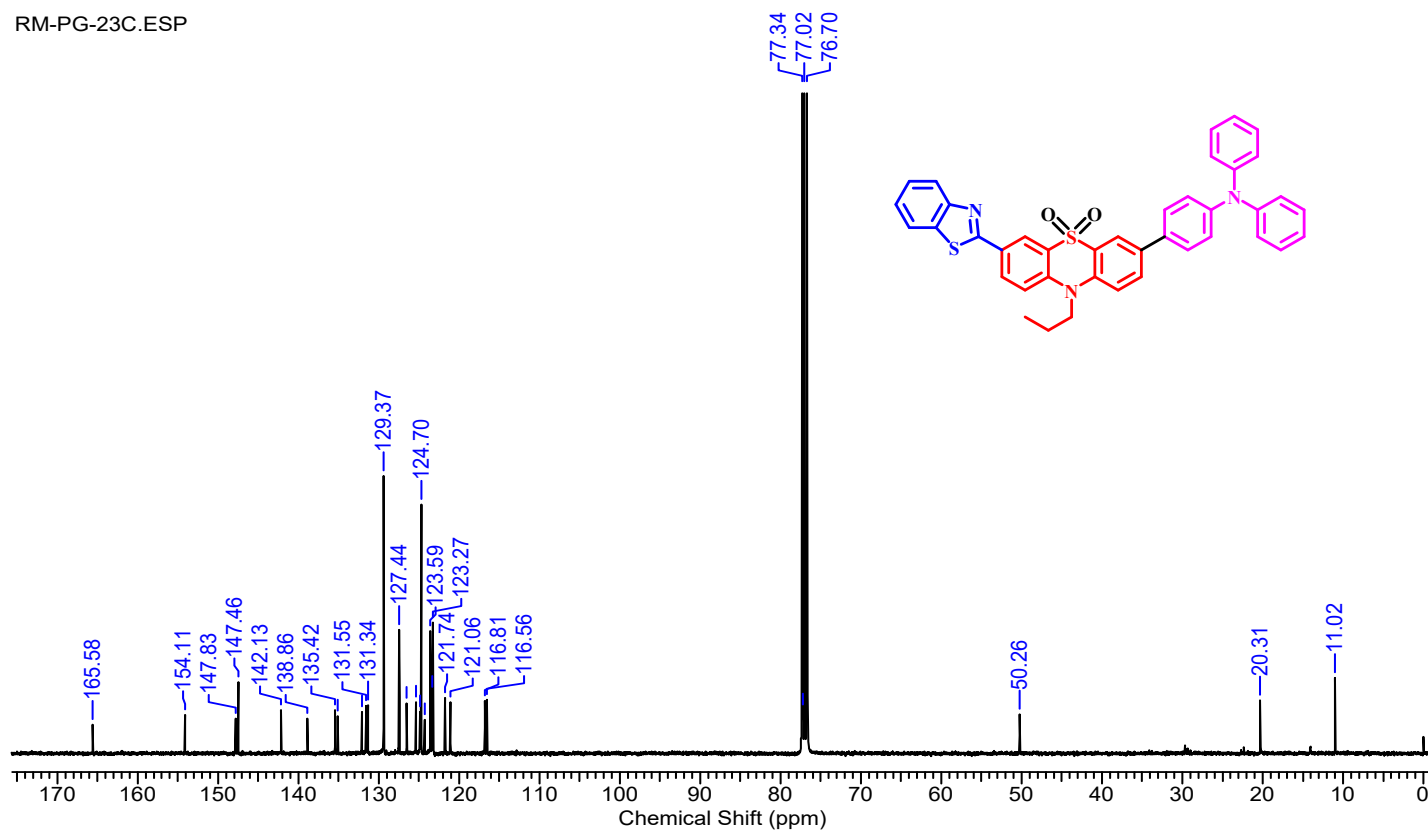

# HRMS of BT-PTZ-1 and BT-PTZ-2

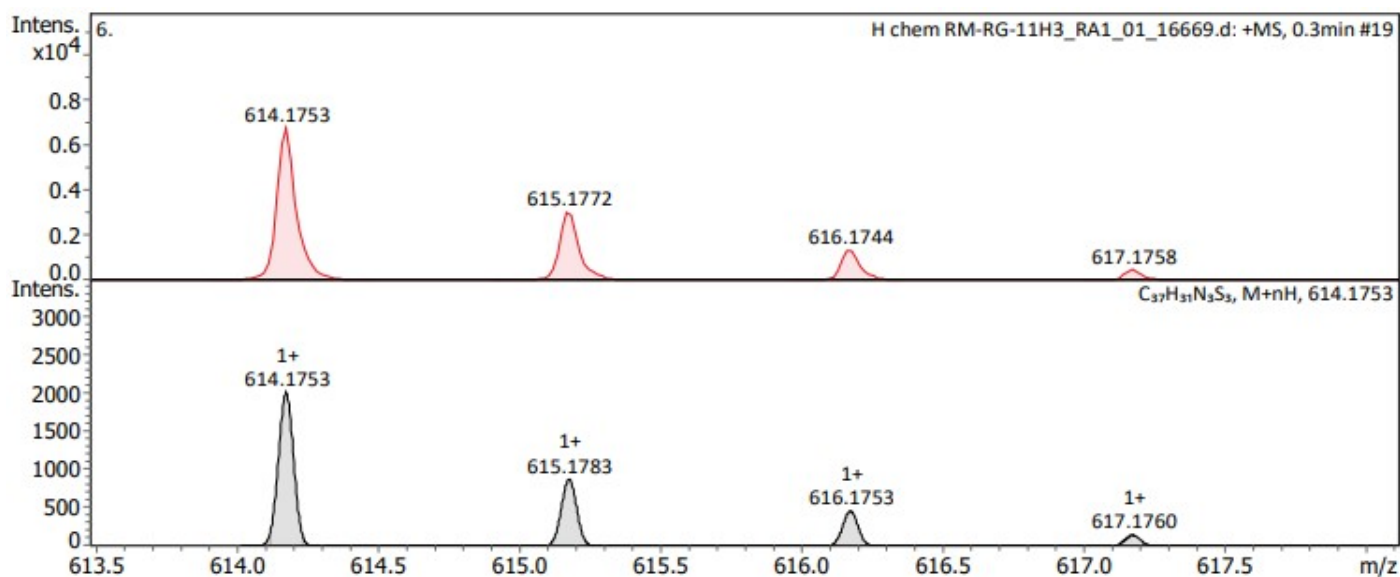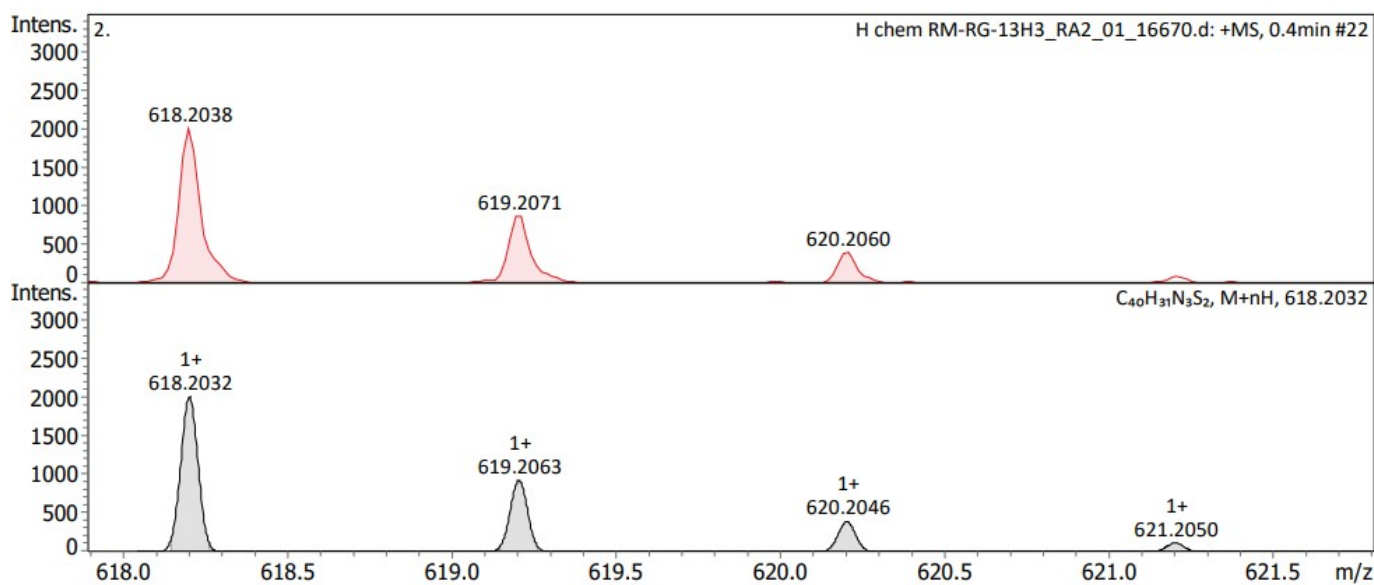

# HRMS of BT-PTZO-1 and BT-PTZO-2

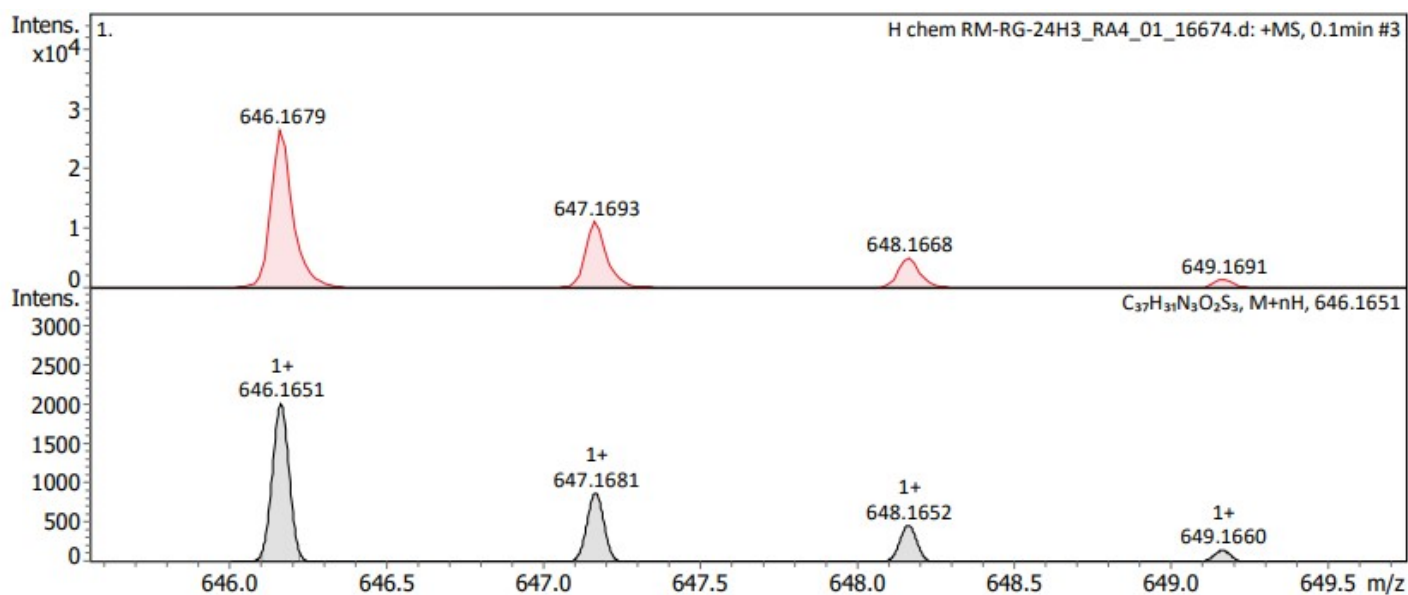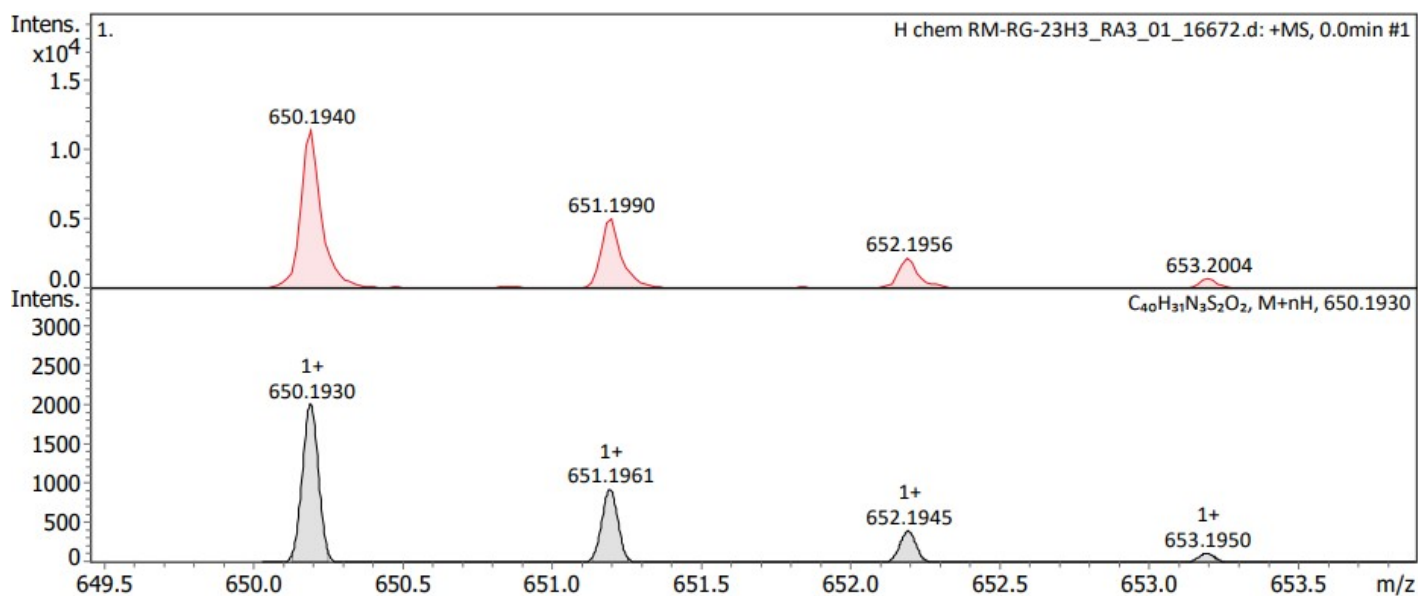

## DFT Calculation data of BT-PTZ-1, BT-PTZ-2, BT-PTZO-1 and BT-PTZO-2

Calculation method: B3LYP/6-31G (d,p) with Gaussian 09

### BT-PTZ-1:

Standard orientation:

```
-----
```

| Center | Atomic | Atomic | Coordinates (Angstroms) |           |           |
|--------|--------|--------|-------------------------|-----------|-----------|
| Number | Number | Type   | X                       | Y         | Z         |
| 1      | 6      | 0      | 7.522681                | -2.744439 | -0.024962 |
| 2      | 6      | 0      | 8.557244                | -2.068187 | 0.669570  |
| 3      | 6      | 0      | 9.776851                | -2.690636 | 0.949498  |
| 4      | 6      | 0      | 9.954993                | -4.007205 | 0.525153  |
| 5      | 6      | 0      | 8.935916                | -4.689804 | -0.164860 |
| 6      | 6      | 0      | 7.722086                | -4.069868 | -0.443267 |
| 7      | 6      | 0      | 6.461590                | -0.810387 | 0.262580  |
| 8      | 1      | 0      | 10.565455               | -2.168199 | 1.481700  |
| 9      | 1      | 0      | 10.894750               | -4.510442 | 0.731738  |
| 10     | 1      | 0      | 9.100979                | -5.714590 | -0.483496 |
| 11     | 1      | 0      | 6.927990                | -4.584777 | -0.974044 |
| 12     | 7      | 0      | 6.371091                | -2.009537 | -0.232625 |
| 13     | 16     | 0      | 8.023905                | -0.446323 | 1.058764  |
| 14     | 6      | 0      | -1.376047               | 2.682057  | 0.924883  |
| 15     | 6      | 0      | -0.076654               | 3.177507  | 0.815307  |
| 16     | 6      | 0      | 0.892210                | 2.503977  | 0.054967  |
| 17     | 6      | 0      | 0.521289                | 1.285589  | -0.545678 |
| 18     | 6      | 0      | -0.766982               | 0.773982  | -0.397015 |
| 19     | 6      | 0      | -1.752924               | 1.472305  | 0.321190  |

```
-----
```

|    |    |   |           |           |           |
|----|----|---|-----------|-----------|-----------|
| 20 | 6  | 0 | 3.166611  | 0.796974  | -0.577935 |
| 21 | 6  | 0 | 3.279814  | 2.079347  | 0.005167  |
| 22 | 6  | 0 | 4.469834  | 2.386412  | 0.687200  |
| 23 | 1  | 0 | 4.591531  | 3.352307  | 1.162414  |
| 24 | 6  | 0 | 5.509744  | 1.463656  | 0.766100  |
| 25 | 6  | 0 | 5.391591  | 0.189185  | 0.192645  |
| 26 | 6  | 0 | 4.191486  | -0.134835 | -0.467427 |
| 27 | 1  | 0 | -2.107580 | 3.254742  | 1.486405  |
| 28 | 1  | 0 | 0.174975  | 4.100262  | 1.325615  |
| 29 | 1  | 0 | -0.998836 | -0.190664 | -0.837711 |
| 30 | 1  | 0 | 6.414196  | 1.745743  | 1.296855  |
| 31 | 1  | 0 | 4.083046  | -1.119918 | -0.907505 |
| 32 | 7  | 0 | 2.213804  | 2.994574  | -0.107862 |
| 33 | 16 | 0 | 1.716447  | 0.417515  | -1.543782 |
| 34 | 6  | 0 | -8.310040 | -4.125001 | 0.295056  |
| 35 | 6  | 0 | -8.075086 | -2.882339 | 0.889277  |
| 36 | 6  | 0 | -7.324117 | -1.898589 | 0.224382  |
| 37 | 6  | 0 | -6.773917 | -2.218280 | -1.033775 |
| 38 | 6  | 0 | -6.979205 | -3.475241 | -1.605910 |
| 39 | 6  | 0 | -7.767113 | -4.427246 | -0.954256 |
| 40 | 6  | 0 | -5.051879 | -0.224030 | -0.506103 |
| 41 | 6  | 0 | -5.779500 | -0.090184 | 0.692930  |
| 42 | 6  | 0 | -5.151022 | 0.558345  | 1.767851  |
| 43 | 1  | 0 | -5.664290 | 0.658907  | 2.717223  |
| 44 | 6  | 0 | -3.860791 | 1.071689  | 1.641808  |
| 45 | 6  | 0 | -3.130749 | 0.937041  | 0.450052  |
| 46 | 6  | 0 | -3.750594 | 0.262301  | -0.615874 |
| 47 | 1  | 0 | -8.905804 | -4.862070 | 0.825320  |

|    |    |   |            |           |           |
|----|----|---|------------|-----------|-----------|
| 48 | 1  | 0 | -8.473463  | -2.686181 | 1.878239  |
| 49 | 1  | 0 | -6.530416  | -3.698349 | -2.569310 |
| 50 | 1  | 0 | -7.940537  | -5.395461 | -1.413213 |
| 51 | 1  | 0 | -3.403267  | 1.550858  | 2.501976  |
| 52 | 1  | 0 | -3.227836  | 0.144036  | -1.560139 |
| 53 | 7  | 0 | -7.091772  | -0.613433 | 0.775404  |
| 54 | 16 | 0 | -5.859753  | -0.964522 | -1.914163 |
| 55 | 6  | 0 | -8.015339  | -0.078441 | 1.781661  |
| 56 | 6  | 0 | -8.343833  | 1.409316  | 1.572349  |
| 57 | 6  | 0 | -9.063211  | 1.691830  | 0.248910  |
| 58 | 6  | 0 | 2.477778   | 4.431079  | 0.043356  |
| 59 | 6  | 0 | 3.409062   | 4.993847  | -1.043409 |
| 60 | 6  | 0 | 2.826116   | 4.891596  | -2.457086 |
| 61 | 1  | 0 | 1.880306   | 5.440611  | -2.537074 |
| 62 | 1  | 0 | 3.518726   | 5.310660  | -3.194150 |
| 63 | 1  | 0 | 2.632220   | 3.850029  | -2.730430 |
| 64 | 1  | 0 | 4.381647   | 4.491878  | -1.007674 |
| 65 | 1  | 0 | 3.595640   | 6.045698  | -0.789785 |
| 66 | 1  | 0 | 2.869075   | 4.664613  | 1.045276  |
| 67 | 1  | 0 | 1.515976   | 4.939373  | -0.043292 |
| 68 | 1  | 0 | -8.945318  | -0.642538 | 1.687831  |
| 69 | 1  | 0 | -7.644036  | -0.249712 | 2.804180  |
| 70 | 1  | 0 | -7.431349  | 2.011731  | 1.633305  |
| 71 | 1  | 0 | -8.974984  | 1.718919  | 2.415830  |
| 72 | 1  | 0 | -9.283878  | 2.759320  | 0.145628  |
| 73 | 1  | 0 | -8.450768  | 1.388584  | -0.605555 |
| 74 | 1  | 0 | -10.012941 | 1.146739  | 0.190309  |

-----

Total Energy (HF) = -2787.5667306 Hartree

**BT-PTZ-2:**

Standard orientation:

-----

| Center | Atomic | Atomic | Coordinates (Angstroms) |           |           |
|--------|--------|--------|-------------------------|-----------|-----------|
| Number | Number | Type   | X                       | Y         | Z         |
| 1      | 6      | 0      | 7.879419                | -2.567097 | -0.792300 |
| 2      | 6      | 0      | 8.868624                | -2.118263 | 0.118824  |
| 3      | 6      | 0      | 10.091637               | -2.780824 | 0.253916  |
| 4      | 6      | 0      | 10.319760               | -3.906504 | -0.537310 |
| 5      | 6      | 0      | 9.346322                | -4.362418 | -1.445678 |
| 6      | 6      | 0      | 8.128893                | -3.702762 | -1.579559 |
| 7      | 6      | 0      | 6.760345                | -0.821126 | 0.013062  |
| 8      | 1      | 0      | 10.845315               | -2.432799 | 0.953136  |
| 9      | 1      | 0      | 11.263104               | -4.436938 | -0.448989 |
| 10     | 1      | 0      | 9.549856                | -5.241536 | -2.049579 |
| 11     | 1      | 0      | 7.369704                | -4.043988 | -2.275730 |
| 12     | 7      | 0      | 6.718870                | -1.817511 | -0.821858 |
| 13     | 16     | 0      | 8.280089                | -0.694772 | 0.951604  |
| 14     | 6      | 0      | -1.174580               | 2.262122  | 1.348094  |
| 15     | 6      | 0      | 0.118399                | 2.775915  | 1.441954  |
| 16     | 6      | 0      | 1.130186                | 2.352379  | 0.565711  |
| 17     | 6      | 0      | 0.806461                | 1.353637  | -0.372865 |
| 18     | 6      | 0      | -0.479579               | 0.820544  | -0.439822 |

-----

|    |    |   |           |           |           |
|----|----|---|-----------|-----------|-----------|
| 19 | 6  | 0 | -1.507123 | 1.278304  | 0.403222  |
| 20 | 6  | 0 | 3.460402  | 0.925050  | -0.447156 |
| 21 | 6  | 0 | 3.526903  | 1.982025  | 0.488840  |
| 22 | 6  | 0 | 4.686842  | 2.089621  | 1.274993  |
| 23 | 1  | 0 | 4.771656  | 2.877059  | 2.014042  |
| 24 | 6  | 0 | 5.742482  | 1.194724  | 1.121438  |
| 25 | 6  | 0 | 5.670867  | 0.142178  | 0.197158  |
| 26 | 6  | 0 | 4.500554  | 0.012399  | -0.574077 |
| 27 | 1  | 0 | -1.925129 | 2.606113  | 2.053023  |
| 28 | 1  | 0 | 0.338158  | 3.498623  | 2.219596  |
| 29 | 1  | 0 | -0.690496 | 0.062900  | -1.188304 |
| 30 | 1  | 0 | 6.622720  | 1.319607  | 1.745013  |
| 31 | 1  | 0 | 4.428177  | -0.801727 | -1.286630 |
| 32 | 7  | 0 | 2.446485  | 2.878957  | 0.607869  |
| 33 | 16 | 0 | 2.052118  | 0.831655  | -1.537587 |
| 34 | 6  | 0 | -4.407121 | -1.135653 | -0.093630 |
| 35 | 6  | 0 | -5.523968 | -0.308264 | 0.111718  |
| 36 | 6  | 0 | -5.303196 | 1.045163  | 0.417426  |
| 37 | 1  | 0 | -6.150891 | 1.703645  | 0.576121  |
| 38 | 6  | 0 | -4.008755 | 1.551342  | 0.500889  |
| 39 | 6  | 0 | -2.882593 | 0.731698  | 0.304643  |
| 40 | 6  | 0 | -3.116223 | -0.623903 | 0.010867  |
| 41 | 1  | 0 | -3.872823 | 2.608082  | 0.711588  |
| 42 | 1  | 0 | -2.274934 | -1.296355 | -0.129007 |
| 43 | 6  | 0 | 2.675359  | 4.212724  | 1.178144  |
| 44 | 6  | 0 | 3.633437  | 5.075438  | 0.339618  |



|    |   |   |            |           |            |
|----|---|---|------------|-----------|------------|
| 45 | 6 | 0 | 3.104788   | 5.381239  | -1.065896  |
| 46 | 1 | 0 | 2.150628   | 5.919933  | -1.022649  |
| 47 | 1 | 0 | 3.814390   | 6.003279  | -1.620987U |
| 48 | 1 | 0 | 2.943717   | 4.461819  | -1.636842  |
| 49 | 1 | 0 | 4.615086   | 4.595224  | 0.268966   |
| 50 | 1 | 0 | 3.787422   | 6.010621  | 0.893946   |
| 51 | 1 | 0 | 3.024375   | 4.149716  | 2.220124   |
| 52 | 1 | 0 | 1.706996   | 4.715161  | 1.202297   |
| 53 | 7 | 0 | -6.842964  | -0.824065 | 0.011693   |
| 54 | 6 | 0 | -7.963682  | -2.997905 | -0.192608  |
| 55 | 6 | 0 | -7.149412  | -2.111807 | 0.532723   |
| 56 | 6 | 0 | -6.645080  | -2.517136 | 1.780034   |
| 57 | 6 | 0 | -6.943414  | -3.784087 | 2.282529   |
| 58 | 6 | 0 | -7.760713  | -4.660703 | 1.562401   |
| 59 | 6 | 0 | -8.271150  | -4.256389 | 0.325156   |
| 60 | 1 | 0 | -8.353689  | -2.694972 | -1.158808  |
| 61 | 1 | 0 | -6.020163  | -1.837044 | 2.349713   |
| 62 | 1 | 0 | -6.544684  | -4.080316 | 3.248705   |
| 63 | 1 | 0 | -7.996210  | -5.643414 | 1.959301   |
| 64 | 1 | 0 | -8.902162  | -4.928363 | -0.249773  |
| 65 | 6 | 0 | -9.875239  | 1.456523  | -1.878494  |
| 66 | 6 | 0 | -8.595524  | 1.381268  | -2.436734  |
| 67 | 6 | 0 | -7.596546  | 0.625618  | -1.822146  |
| 68 | 6 | 0 | -7.860185  | -0.057443 | -0.622941  |
| 69 | 6 | 0 | -9.144672  | 0.026167  | -0.060022  |
| 70 | 6 | 0 | -10.142667 | 0.770553  | -0.689804  |

|    |   |   |            |           |           |
|----|---|---|------------|-----------|-----------|
| 71 | 1 | 0 | -10.652152 | 2.040408  | -2.362477 |
| 72 | 1 | 0 | -8.373769  | 1.902540  | -3.363746 |
| 73 | 1 | 0 | -6.608834  | 0.561501  | -2.267040 |
| 74 | 1 | 0 | -9.355537  | -0.495289 | 0.868002  |
| 75 | 1 | 0 | -11.130163 | 0.824222  | -0.240095 |
| 76 | 1 | 0 | -4.553263  | -2.185590 | -0.325003 |

-----  
Total Energy (HF) = -2503.6975827 Hartree

**BT-PTZO-1:**

Standard orientation

-----

| Center<br>Number | Atomic<br>Number | Atomic<br>Type | Coordinates (Angstroms) |          |           |
|------------------|------------------|----------------|-------------------------|----------|-----------|
|                  |                  |                | X                       | Y        | Z         |
| 1                | 6                | 0              | 7.371624                | 2.809143 | -0.103889 |
| 2                | 6                | 0              | 8.441712                | 2.139007 | -0.748890 |
| 3                | 6                | 0              | 9.653567                | 2.783188 | -1.013135 |
| 4                | 6                | 0              | 9.786235                | 4.115289 | -0.622792 |
| 5                | 6                | 0              | 8.731498                | 4.791941 | 0.018359  |
| 6                | 6                | 0              | 7.525713                | 4.150673 | 0.281072  |
| 7                | 6                | 0              | 6.368277                | 0.842964 | -0.364405 |
| 8                | 1                | 0              | 10.469869               | 2.265937 | -1.507123 |
| 9                | 1                | 0              | 10.718842               | 4.636154 | -0.817618 |
| 10               | 1                | 0              | 8.862949                | 5.829092 | 0.311288  |
| 11               | 1                | 0              | 6.704223                | 4.659650 | 0.774353  |
| 12               | 7                | 0              | 6.232818                | 2.051827 | 0.092183  |

|    |    |   |           |           |           |
|----|----|---|-----------|-----------|-----------|
| 13 | 16 | 0 | 7.959610  | 0.493338  | -1.103989 |
| 14 | 6  | 0 | -1.471264 | -2.714090 | -1.011332 |
| 15 | 6  | 0 | -0.181819 | -3.229477 | -0.936314 |
| 16 | 6  | 0 | 0.828287  | -2.554579 | -0.223462 |
| 17 | 6  | 0 | 0.456102  | -1.343692 | 0.392385  |
| 18 | 6  | 0 | -0.826096 | -0.808283 | 0.286985  |
| 19 | 6  | 0 | -1.828784 | -1.489572 | -0.413800 |
| 20 | 6  | 0 | 3.104444  | -0.838684 | 0.418490  |
| 21 | 6  | 0 | 3.225661  | -2.116510 | -0.172748 |
| 22 | 6  | 0 | 4.457166  | -2.409715 | -0.794098 |
| 23 | 1  | 0 | 4.616357  | -3.370645 | -1.266827 |
| 24 | 6  | 0 | 5.471594  | -1.462821 | -0.847363 |
| 25 | 6  | 0 | 5.317280  | -0.177774 | -0.295407 |
| 26 | 6  | 0 | 4.106608  | 0.120435  | 0.346016  |
| 27 | 1  | 0 | -2.220807 | -3.279672 | -1.556128 |
| 28 | 1  | 0 | 0.040075  | -4.150245 | -1.462405 |
| 29 | 1  | 0 | -1.019866 | 0.155119  | 0.747408  |
| 30 | 1  | 0 | 6.394782  | -1.729224 | -1.353573 |
| 31 | 1  | 0 | 3.955349  | 1.094675  | 0.797871  |
| 32 | 7  | 0 | 2.157751  | -3.023472 | -0.178714 |
| 33 | 6  | 0 | -8.339549 | 4.161249  | -0.380303 |
| 34 | 6  | 0 | -8.123768 | 2.905664  | -0.954322 |
| 35 | 6  | 0 | -7.368058 | 1.930064  | -0.283310 |
| 36 | 6  | 0 | -6.793387 | 2.269653  | 0.958067  |
| 37 | 6  | 0 | -6.979518 | 3.538885  | 1.509309  |
| 38 | 6  | 0 | -7.772367 | 4.483502  | 0.853060  |

|    |    |   |           |           |           |
|----|----|---|-----------|-----------|-----------|
| 39 | 6  | 0 | -5.093555 | 0.256008  | 0.437466  |
| 40 | 6  | 0 | -5.844577 | 0.102412  | -0.745693 |
| 41 | 6  | 0 | -5.242124 | -0.575299 | -1.817697 |
| 42 | 1  | 0 | -5.773781 | -0.691807 | -2.754918 |
| 43 | 6  | 0 | -3.955003 | -1.098490 | -1.703808 |
| 44 | 6  | 0 | -3.202764 | -0.943392 | -0.528745 |
| 45 | 6  | 0 | -3.794777 | -0.238999 | 0.533846  |
| 46 | 1  | 0 | -8.939473 | 4.892242  | -0.914211 |
| 47 | 1  | 0 | -8.540833 | 2.693525  | -1.932203 |
| 48 | 1  | 0 | -6.511115 | 3.777779  | 2.459418  |
| 49 | 1  | 0 | -7.930462 | 5.461788  | 1.295832  |
| 50 | 1  | 0 | -3.519141 | -1.600242 | -2.562421 |
| 51 | 1  | 0 | -3.253553 | -0.103773 | 1.465338  |
| 52 | 7  | 0 | -7.152916 | 0.632758  | -0.815154 |
| 53 | 16 | 0 | -5.869900 | 1.027843  | 1.845460  |
| 54 | 6  | 0 | -8.098077 | 0.085946  | -1.795201 |
| 55 | 6  | 0 | -8.433526 | -1.395367 | -1.553691 |
| 56 | 6  | 0 | -9.134102 | -1.649652 | -0.214518 |
| 57 | 6  | 0 | 2.439285  | -4.465406 | -0.313923 |
| 58 | 6  | 0 | 3.271035  | -5.034211 | 0.847553  |
| 59 | 6  | 0 | 2.567362  | -4.942220 | 2.206322  |
| 60 | 1  | 0 | 1.613898  | -5.484083 | 2.195306  |
| 61 | 1  | 0 | 3.190132  | -5.383253 | 2.991168  |
| 62 | 1  | 0 | 2.362732  | -3.904372 | 2.485237  |
| 63 | 1  | 0 | 4.242971  | -4.531527 | 0.897898  |
| 64 | 1  | 0 | 3.480287  | -6.083383 | 0.599789  |

|    |    |   |            |           |           |
|----|----|---|------------|-----------|-----------|
| 65 | 1  | 0 | 2.918920   | -4.673996 | -1.279285 |
| 66 | 1  | 0 | 1.478488   | -4.979114 | -0.322936 |
| 67 | 1  | 0 | -9.022099  | 0.658454  | -1.695039 |
| 68 | 1  | 0 | -7.743703  | 0.236655  | -2.826881 |
| 69 | 1  | 0 | -7.526549  | -2.005741 | -1.618449 |
| 70 | 1  | 0 | -9.080138  | -1.715088 | -2.381525 |
| 71 | 1  | 0 | -9.362360  | -2.713290 | -0.090333 |
| 72 | 1  | 0 | -8.505863  | -1.338345 | 0.625405  |
| 73 | 1  | 0 | -10.078029 | -1.095328 | -0.149982 |
| 74 | 16 | 0 | 1.661479   | -0.528760 | 1.413675  |
| 75 | 8  | 0 | 1.381821   | 0.915210  | 1.477385  |
| 76 | 8  | 0 | 1.799840   | -1.292858 | 2.669427  |

-----  
Total Energy (HF) = -2937.9517787 Hartree

## BT-PTZO-2:

Standard orientation

-----

| Center | Atomic | Atomic | Coordinates (Angstroms) |          |           |
|--------|--------|--------|-------------------------|----------|-----------|
| Number | Number | Type   | X                       | Y        | Z         |
| 1      | 6      | 0      | 7.702382                | 2.682725 | 0.660466  |
| 2      | 6      | 0      | 8.732142                | 2.219613 | -0.197070 |
| 3      | 6      | 0      | 9.947306                | 2.900148 | -0.313210 |
| 4      | 6      | 0      | 10.124785               | 4.058141 | 0.443150  |
| 5      | 6      | 0      | 9.110622                | 4.528353 | 1.298561  |
| 6      | 6      | 0      | 7.901376                | 3.851117 | 1.413568  |
| 7      | 6      | 0      | 6.646646                | 0.888855 | -0.119207 |

|    |    |   |           |           |           |
|----|----|---|-----------|-----------|-----------|
| 8  | 1  | 0 | 10.732499 | 2.541551  | -0.971079 |
| 9  | 1  | 0 | 11.060894 | 4.603332  | 0.369228  |
| 10 | 1  | 0 | 9.276468  | 5.432596  | 1.876146  |
| 11 | 1  | 0 | 7.110906  | 4.202015  | 2.068756  |
| 12 | 7  | 0 | 6.555178  | 1.912878  | 0.675390  |
| 13 | 16 | 0 | 8.200431  | 0.754865  | -0.996050 |
| 14 | 6  | 0 | -1.281620 | -2.291568 | -1.432201 |
| 15 | 6  | 0 | 0.000531  | -2.813306 | -1.562229 |
| 16 | 6  | 0 | 1.051575  | -2.369581 | -0.735529 |
| 17 | 6  | 0 | 0.725504  | -1.378915 | 0.211475  |
| 18 | 6  | 0 | -0.553596 | -0.838376 | 0.325915  |
| 19 | 6  | 0 | -1.596121 | -1.289310 | -0.492989 |
| 20 | 6  | 0 | 3.380350  | -0.920649 | 0.275155  |
| 21 | 6  | 0 | 3.456852  | -1.974932 | -0.662708 |
| 22 | 6  | 0 | 4.659993  | -2.086258 | -1.389869 |
| 23 | 1  | 0 | 4.784033  | -2.871966 | -2.124226 |
| 24 | 6  | 0 | 5.688728  | -1.171391 | -1.209567 |
| 25 | 6  | 0 | 5.578305  | -0.098605 | -0.305599 |
| 26 | 6  | 0 | 4.397129  | 0.011232  | 0.441817  |
| 27 | 1  | 0 | -2.050248 | -2.639200 | -2.115710 |
| 28 | 1  | 0 | 0.190083  | -3.532088 | -2.350549 |
| 29 | 1  | 0 | -0.725899 | -0.082325 | 1.084959  |
| 30 | 1  | 0 | 6.588080  | -1.288022 | -1.807073 |
| 31 | 1  | 0 | 4.280696  | 0.814779  | 1.160819  |
| 32 | 7  | 0 | 2.373868  | -2.834817 | -0.887625 |
| 33 | 6  | 0 | 2.627793  | -4.179831 | -1.438874 |
| 34 | 6  | 0 | 3.483153  | -5.063233 | -0.515748 |
| 35 | 6  | 0 | 2.819262  | -5.359774 | 0.833812  |

|    |    |   |            |           |           |
|----|----|---|------------|-----------|-----------|
| 36 | 1  | 0 | 1.858274   | -5.870509 | 0.698072  |
| 37 | 1  | 0 | 3.457515   | -6.010158 | 1.440428  |
| 38 | 1  | 0 | 2.637660   | -4.443668 | 1.403657  |
| 39 | 1  | 0 | 4.463508   | -4.602025 | -0.353841 |
| 40 | 1  | 0 | 3.669637   | -5.998767 | -1.059792 |
| 41 | 1  | 0 | 3.077357   | -4.105283 | -2.437649 |
| 42 | 1  | 0 | 1.659436   | -4.662509 | -1.565624 |
| 43 | 16 | 0 | 1.981034   | -0.900899 | 1.375244  |
| 44 | 8  | 0 | 1.729288   | 0.466523  | 1.860307  |
| 45 | 8  | 0 | 2.154794   | -1.992380 | 2.354236  |
| 46 | 6  | 0 | -2.965417  | -0.732921 | -0.381836 |
| 47 | 6  | 0 | -3.181274  | 0.626093  | -0.090623 |
| 48 | 6  | 0 | -4.465622  | 1.150953  | 0.020985  |
| 49 | 1  | 0 | -2.332240  | 1.289965  | 0.043404  |
| 50 | 6  | 0 | -5.388494  | -1.024602 | -0.469299 |
| 51 | 6  | 0 | -5.593080  | 0.333588  | -0.170742 |
| 52 | 1  | 0 | -4.598708  | 2.202959  | 0.250004  |
| 53 | 1  | 0 | -6.243750  | -1.675926 | -0.615514 |
| 54 | 7  | 0 | -6.903843  | 0.863080  | -0.063966 |
| 55 | 6  | 0 | -7.931088  | 0.102800  | 0.564216  |
| 56 | 6  | 0 | -7.198102  | 2.159156  | -0.573456 |
| 57 | 6  | 0 | -9.212334  | 0.030246  | -0.006682 |
| 58 | 6  | 0 | -7.679710  | -0.580795 | 1.765445  |
| 59 | 6  | 0 | -6.702383  | 2.565227  | -1.823732 |
| 60 | 6  | 0 | -7.994249  | 3.049636  | 0.165856  |
| 61 | 6  | 0 | -10.220364 | -0.705350 | 0.617632  |
| 62 | 1  | 0 | -9.413059  | 0.553888  | -0.935742 |
| 63 | 6  | 0 | -8.688566  | -1.327728 | 2.374586  |

|    |   |   |            |           |           |
|----|---|---|------------|-----------|-----------|
| 64 | 1 | 0 | -6.694531  | -0.523174 | 2.216922  |
| 65 | 6 | 0 | -6.990708  | 3.838682  | -2.315586 |
| 66 | 1 | 0 | -6.092446  | 1.880753  | -2.404367 |
| 67 | 6 | 0 | -8.292090  | 4.314844  | -0.341143 |
| 68 | 1 | 0 | -8.377773  | 2.744986  | 1.134115  |
| 69 | 6 | 0 | -9.965325  | -1.392536 | 1.808292  |
| 70 | 1 | 0 | -11.205837 | -0.750653 | 0.162686  |
| 71 | 1 | 0 | -8.477105  | -1.849535 | 3.303631  |
| 72 | 6 | 0 | -7.789763  | 4.720294  | -1.581288 |
| 73 | 1 | 0 | -6.598958  | 4.136154  | -3.284204 |
| 74 | 1 | 0 | -8.908981  | 4.990844  | 0.244194  |
| 75 | 1 | 0 | -10.750074 | -1.969144 | 2.288323  |
| 76 | 1 | 0 | -8.017631  | 5.708133  | -1.969780 |
| 77 | 6 | 0 | -4.100219  | -1.543467 | -0.563592 |
| 78 | 1 | 0 | -3.978149  | -2.603043 | -0.769129 |

-----  
Total Energy (HF) = -2654.0831653 Hartree

## TDDFT calculation data of BT-PTZ-1, BT-PTZ-2, BT-PTZO-1 and BT-PTZO-2

### BT-PTZ-1:

Excitation energies and oscillator strengths:

Excited State 1: Singlet-A 2.8344 eV 437.43 nm f=0.2332 <S\*\*2>=0.000

160 -> 162 -0.44791

161 -> 162 0.49221

161 -> 163 0.20311

This state for optimization and/or second-order correction.

Total Energy, E(TD-HF/TD-KS) = -2787.00321690

Copying the excited state density for this state as the 1-particle RhoCI density.



Excited State 2: Singlet-A 2.9984 eV 413.50 nm  $f=0.0231$   $\langle S^{*2} \rangle=0.000$

160 -> 162 0.40767

160 -> 163 0.17702

161 -> 162 0.18845

161 -> 163 0.48530

161 -> 165 0.11892

Excited State 3: Singlet-A 3.1210 eV 397.26 nm  $f=0.0264$   $\langle S^{*2} \rangle=0.000$

160 -> 162 -0.23386

160 -> 163 -0.23099

161 -> 162 -0.43188

161 -> 163 0.43966

Excited State 4: Singlet-A 3.2296 eV 383.90 nm  $f=0.0365$   $\langle S^{*2} \rangle=0.000$

160 -> 162 -0.25892

160 -> 163 0.59572

160 -> 164 0.11669

161 -> 162 -0.17139

161 -> 165 0.10975

Excited State 5: Singlet-A 3.2832 eV 377.63 nm  $f=0.1440$   $\langle S^{*2} \rangle=0.000$

160 -> 164 -0.10244

160 -> 165 0.16382

161 -> 164 0.61675

161 -> 165 0.23262

Excited State 6: Singlet-A 3.4160 eV 362.96 nm  $f=0.0525$   $\langle S^{*2} \rangle=0.000$

160 -> 163 -0.19078

160 -> 164 0.54944

161 -> 165 0.35332

Excited State 7: Singlet-A 3.6848 eV 336.48 nm  $f=0.0562$   $\langle S^{*2} \rangle=0.000$

160 -> 164 -0.33383

|                   |                                                     |
|-------------------|-----------------------------------------------------|
| 161 -> 164        | -0.28905                                            |
| 161 -> 165        | 0.45933                                             |
| 161 -> 166        | -0.20453                                            |
| 161 -> 168        | 0.13518                                             |
| Excited State 8:  | Singlet-A 3.7195 eV 333.33 nm f=0.0537 <S**2>=0.000 |
| 160 -> 164        | -0.12054                                            |
| 160 -> 166        | 0.19754                                             |
| 161 -> 165        | 0.15556                                             |
| 161 -> 166        | 0.62891                                             |
| Excited State 9:  | Singlet-A 3.8412 eV 322.78 nm f=0.0462 <S**2>=0.000 |
| 160 -> 164        | 0.16204                                             |
| 160 -> 165        | 0.63024                                             |
| 161 -> 164        | -0.11484                                            |
| 161 -> 165        | -0.12751                                            |
| 161 -> 168        | 0.13937                                             |
| Excited State 10: | Singlet-A 4.0223 eV 308.24 nm f=0.0322 <S**2>=0.000 |
| 160 -> 165        | -0.16324                                            |
| 160 -> 167        | -0.14749                                            |
| 160 -> 168        | -0.27494                                            |
| 161 -> 167        | 0.23559                                             |
| 161 -> 168        | 0.51450                                             |
| 161 -> 169        | 0.12266                                             |
| Excited State 11: | Singlet-A 4.1065 eV 301.92 nm f=0.7478 <S**2>=0.000 |
| 158 -> 162        | 0.33922                                             |
| 159 -> 162        | 0.46897                                             |
| 159 -> 163        | 0.10847                                             |
| 160 -> 167        | -0.20563                                            |
| 161 -> 167        | 0.15838                                             |

161 -> 168 -0.18313

Excited State 12: Singlet-A 4.1421 eV 299.33 nm f=0.1756 <S\*\*2>=0.000

158 -> 162 -0.10144

159 -> 162 -0.30892

160 -> 167 -0.29500

161 -> 167 0.45567

161 -> 168 -0.25322

161 -> 169 -0.11781

Excited State 13: Singlet-A 4.1615 eV 297.93 nm f=0.0133 <S\*\*2>=0.000

159 -> 162 0.12211

160 -> 168 0.53456

161 -> 167 0.29730

161 -> 168 0.12591

161 -> 169 0.18903

Excited State 14: Singlet-A 4.2091 eV 294.56 nm f=0.0714 <S\*\*2>=0.000

156 -> 162 -0.21103

157 -> 162 0.12746

158 -> 162 0.52174

159 -> 162 -0.31768

160 -> 168 0.10083

161 -> 169 0.14290

Excited State 15: Singlet-A 4.2409 eV 292.36 nm f=0.0082 <S\*\*2>=0.000

158 -> 162 -0.12476

160 -> 166 -0.35108

160 -> 167 -0.11135

161 -> 166 0.14530

161 -> 168 -0.17817

161 -> 169 0.45171

161 -> 170 0.12832

SavETr: write IOETrn= 770 NScale= 10 NData= 16 NLR=1 NState= 15 LETran= 280.

### BT-PTZ-2:

Excitation energies and oscillator strengths:

Excited State 1: Singlet-A 2.7397 eV 452.54 nm f=0.5356 <S\*\*2>=0.000

161 -> 163 -0.17877

162 -> 163 0.67065

162 -> 164 0.10012

This state for optimization and/or second-order correction.

Total Energy, E(TD-HF/TD-KS) = -2503.56752342

Copying the excited state density for this state as the 1-particle RhoCI density.

Excited State 2: Singlet-A 3.2290 eV 383.98 nm f=0.0105 <S\*\*2>=0.000

161 -> 163 0.63460

161 -> 164 0.10802

162 -> 163 0.20373

162 -> 164 -0.17514

Excited State 3: Singlet-A 3.3078 eV 374.83 nm f=0.4870 <S\*\*2>=0.000

160 -> 163 0.10722

161 -> 163 0.17699

162 -> 164 0.64961

162 -> 165 0.10609

Excited State 4: Singlet-A 3.4750 eV 356.79 nm f=0.0101 <S\*\*2>=0.000

161 -> 165 0.13766

162 -> 165 0.65438

Excited State 5: Singlet-A 3.6131 eV 343.16 nm f=0.1064 <S\*\*2>=0.000

161 -> 164 0.49665

161 -> 167 0.14038

|                   |           |           |           |          |              |
|-------------------|-----------|-----------|-----------|----------|--------------|
| 162 -> 166        | 0.33504   |           |           |          |              |
| 162 -> 167        | -0.26998  |           |           |          |              |
| Excited State 6:  | Singlet-A | 3.6874 eV | 336.23 nm | f=0.1455 | <S**2>=0.000 |
| 160 -> 163        | 0.13122   |           |           |          |              |
| 161 -> 165        | 0.20550   |           |           |          |              |
| 161 -> 166        | 0.15201   |           |           |          |              |
| 162 -> 166        | 0.39373   |           |           |          |              |
| 162 -> 167        | 0.31589   |           |           |          |              |
| 162 -> 168        | 0.34975   |           |           |          |              |
| Excited State 7:  | Singlet-A | 3.7199 eV | 333.30 nm | f=0.1526 | <S**2>=0.000 |
| 160 -> 163        | -0.14693  |           |           |          |              |
| 161 -> 164        | -0.36900  |           |           |          |              |
| 161 -> 165        | -0.13885  |           |           |          |              |
| 161 -> 166        | 0.14951   |           |           |          |              |
| 162 -> 166        | 0.40637   |           |           |          |              |
| 162 -> 168        | -0.31943  |           |           |          |              |
| Excited State 8:  | Singlet-A | 3.7918 eV | 326.98 nm | f=0.0624 | <S**2>=0.000 |
| 160 -> 163        | 0.10851   |           |           |          |              |
| 161 -> 164        | 0.27310   |           |           |          |              |
| 161 -> 165        | -0.17895  |           |           |          |              |
| 161 -> 167        | -0.10046  |           |           |          |              |
| 162 -> 167        | 0.44475   |           |           |          |              |
| 162 -> 168        | -0.36351  |           |           |          |              |
| Excited State 9:  | Singlet-A | 3.8830 eV | 319.30 nm | f=0.7456 | <S**2>=0.000 |
| 160 -> 163        | 0.61571   |           |           |          |              |
| 162 -> 167        | -0.22999  |           |           |          |              |
| Excited State 10: | Singlet-A | 4.0107 eV | 309.14 nm | f=0.0222 | <S**2>=0.000 |
| 161 -> 165        | 0.56051   |           |           |          |              |

|                   |                                                     |
|-------------------|-----------------------------------------------------|
| 161 -> 168        | -0.19216                                            |
| 162 -> 165        | -0.11700                                            |
| 162 -> 168        | -0.31152                                            |
| Excited State 11: | Singlet-A 4.1013 eV 302.30 nm f=0.0045 <S**2>=0.000 |
| 158 -> 163        | 0.54543                                             |
| 159 -> 163        | 0.14339                                             |
| 160 -> 169        | -0.10130                                            |
| 161 -> 169        | 0.13115                                             |
| 162 -> 169        | -0.34823                                            |
| Excited State 12: | Singlet-A 4.1376 eV 299.66 nm f=0.0082 <S**2>=0.000 |
| 161 -> 170        | -0.14196                                            |
| 162 -> 169        | -0.11196                                            |
| 162 -> 170        | 0.64951                                             |
| Excited State 13: | Singlet-A 4.1741 eV 297.03 nm f=0.0449 <S**2>=0.000 |
| 159 -> 163        | -0.12666                                            |
| 161 -> 165        | 0.20982                                             |
| 161 -> 166        | 0.21812                                             |
| 161 -> 168        | 0.37286                                             |
| 162 -> 165        | -0.10732                                            |
| 162 -> 171        | 0.19993                                             |
| 162 -> 173        | -0.13441                                            |
| 162 -> 175        | 0.31142                                             |
| 162 -> 176        | -0.11787                                            |
| Excited State 14: | Singlet-A 4.2029 eV 295.00 nm f=0.0225 <S**2>=0.000 |
| 159 -> 163        | 0.39077                                             |
| 161 -> 167        | -0.20016                                            |
| 162 -> 167        | -0.14850                                            |
| 162 -> 169        | 0.32572                                             |

162 -> 170    0.10389  
 162 -> 171    0.16321  
 162 -> 173    -0.26236  
 Excited State 15:    Singlet-A    4.2178 eV 293.96 nm f=0.0446 <S\*\*2>=0.000  
 161 -> 166    0.51678  
 162 -> 166    -0.15225  
 162 -> 167    -0.12464  
 162 -> 171    -0.27911  
 162 -> 172    -0.22566  
 162 -> 174    0.10556  
 SavETr: write IOETrn= 770 NScale= 10 NData= 16 NLR=1 NState= 15 LETran= 280.

### BT-PTZO-1:

Excitation energies and oscillator strengths:

Excited State 1:    Singlet-A    3.0449 eV 407.18 nm f=0.1370 <S\*\*2>=0.000  
 169 -> 170    0.68681  
 169 -> 171    0.11457

This state for optimization and/or second-order correction.

Total Energy, E(TD-HF/TD-KS) = -2937.79909426

Copying the excited state density for this state as the 1-particle RhoCI density.

Excited State 2:    Singlet-A    3.0941 eV 400.71 nm f=0.0069 <S\*\*2>=0.000  
 169 -> 170    -0.12018  
 169 -> 171    0.68682  
 Excited State 3:    Singlet-A    3.4786 eV 356.42 nm f=0.6204 <S\*\*2>=0.000  
 168 -> 170    0.43343  
 169 -> 170    0.11108  
 169 -> 172    0.51450  
 Excited State 4:    Singlet-A    3.5107 eV 353.17 nm f=0.1162 <S\*\*2>=0.000

|                            |                                           |
|----------------------------|-------------------------------------------|
| 168 -> 170                 | 0.32759                                   |
| 168 -> 171                 | 0.49351                                   |
| 169 -> 172                 | -0.33736                                  |
| Excited State 5: Singlet-A | 3.5497 eV 349.28 nm f=0.1595 <S**2>=0.000 |
| 168 -> 170                 | -0.41848                                  |
| 168 -> 171                 | 0.46629                                   |
| 169 -> 172                 | 0.25354                                   |
| Excited State 6: Singlet-A | 3.8620 eV 321.04 nm f=0.0396 <S**2>=0.000 |
| 167 -> 170                 | 0.10437                                   |
| 167 -> 172                 | -0.10173                                  |
| 169 -> 173                 | -0.23182                                  |
| 169 -> 174                 | 0.59876                                   |
| 169 -> 175                 | 0.11922                                   |
| 169 -> 177                 | -0.13796                                  |
| Excited State 7: Singlet-A | 4.0107 eV 309.14 nm f=0.1108 <S**2>=0.000 |
| 165 -> 170                 | 0.16771                                   |
| 167 -> 170                 | 0.52355                                   |
| 168 -> 172                 | 0.12218                                   |
| 169 -> 173                 | 0.26564                                   |
| 169 -> 175                 | 0.17202                                   |
| 169 -> 177                 | -0.20864                                  |
| Excited State 8: Singlet-A | 4.0263 eV 307.94 nm f=0.0335 <S**2>=0.000 |
| 165 -> 170                 | -0.28054                                  |
| 167 -> 170                 | -0.24467                                  |
| 167 -> 171                 | -0.28015                                  |
| 168 -> 173                 | -0.15420                                  |
| 169 -> 172                 | -0.10549                                  |
| 169 -> 173                 | 0.39719                                   |



|                   |           |           |           |          |              |
|-------------------|-----------|-----------|-----------|----------|--------------|
| 169 -> 174        | 0.17424   |           |           |          |              |
| 169 -> 175        | 0.10015   |           |           |          |              |
| Excited State 9:  | Singlet-A | 4.0487 eV | 306.23 nm | f=0.0475 | <S**2>=0.000 |
| 167 -> 170        | -0.22210  |           |           |          |              |
| 167 -> 171        | 0.40986   |           |           |          |              |
| 169 -> 174        | -0.13912  |           |           |          |              |
| 169 -> 175        | 0.26564   |           |           |          |              |
| 169 -> 176        | 0.16375   |           |           |          |              |
| 169 -> 177        | -0.34553  |           |           |          |              |
| Excited State 10: | Singlet-A | 4.0668 eV | 304.87 nm | f=0.0165 | <S**2>=0.000 |
| 165 -> 170        | 0.18242   |           |           |          |              |
| 167 -> 171        | 0.37962   |           |           |          |              |
| 169 -> 173        | 0.40121   |           |           |          |              |
| 169 -> 174        | 0.21139   |           |           |          |              |
| 169 -> 175        | -0.14955  |           |           |          |              |
| 169 -> 176        | -0.13239  |           |           |          |              |
| 169 -> 177        | 0.20423   |           |           |          |              |
| Excited State 11: | Singlet-A | 4.0819 eV | 303.74 nm | f=0.0773 | <S**2>=0.000 |
| 165 -> 170        | 0.46191   |           |           |          |              |
| 166 -> 170        | -0.31216  |           |           |          |              |
| 167 -> 170        | -0.25455  |           |           |          |              |
| 167 -> 171        | -0.25180  |           |           |          |              |
| 169 -> 177        | -0.10938  |           |           |          |              |
| Excited State 12: | Singlet-A | 4.1947 eV | 295.57 nm | f=0.2347 | <S**2>=0.000 |
| 165 -> 170        | 0.13699   |           |           |          |              |
| 166 -> 170        | 0.15160   |           |           |          |              |
| 167 -> 170        | -0.13784  |           |           |          |              |
| 167 -> 172        | 0.11255   |           |           |          |              |

|                                                                       |          |
|-----------------------------------------------------------------------|----------|
| 168 -> 172                                                            | 0.58316  |
| 169 -> 173                                                            | -0.12894 |
| 169 -> 178                                                            | 0.11517  |
| 169 -> 180                                                            | -0.10170 |
| Excited State 13: Singlet-A 4.2667 eV 290.59 nm f=0.1260 <S**2>=0.000 |          |
| 164 -> 170                                                            | 0.11362  |
| 165 -> 170                                                            | 0.27150  |
| 166 -> 170                                                            | 0.55974  |
| 168 -> 172                                                            | -0.22703 |
| Excited State 14: Singlet-A 4.2894 eV 289.05 nm f=0.0359 <S**2>=0.000 |          |
| 166 -> 171                                                            | 0.13613  |
| 167 -> 172                                                            | 0.11672  |
| 168 -> 172                                                            | -0.16222 |
| 168 -> 173                                                            | 0.14483  |
| 169 -> 175                                                            | 0.26182  |
| 169 -> 177                                                            | 0.16838  |
| 169 -> 178                                                            | 0.46355  |
| 169 -> 180                                                            | -0.18467 |
| Excited State 15: Singlet-A 4.3162 eV 287.25 nm f=0.0210 <S**2>=0.000 |          |
| 162 -> 170                                                            | -0.12372 |
| 165 -> 171                                                            | 0.26057  |
| 166 -> 171                                                            | 0.48472  |
| 167 -> 171                                                            | -0.12329 |
| 168 -> 173                                                            | 0.21636  |
| 169 -> 175                                                            | -0.13020 |
| 169 -> 178                                                            | -0.18273 |

SavETr: write IOETrn= 770 NScale= 10 NData= 16 NLR=1 NState= 15 LETran= 280.

## BT-PTZO-2:

Excitation energies and oscillator strengths:

Excited State 1: Singlet-A 2.8772 eV 430.92 nm  $f=0.3916$   $\langle S^{**2} \rangle=0.000$   
170 -> 171 0.69357

This state for optimization and/or second-order correction.

Total Energy, E(TD-HF/TD-KS) = -2653.96254158

Copying the excited state density for this state as the 1-particle RhoCI density.

Excited State 2: Singlet-A 3.2175 eV 385.35 nm  $f=0.0372$   $\langle S^{**2} \rangle=0.000$   
170 -> 172 0.68341  
170 -> 174 0.12749

Excited State 3: Singlet-A 3.3459 eV 370.55 nm  $f=0.7139$   $\langle S^{**2} \rangle=0.000$   
169 -> 171 -0.21104  
170 -> 171 0.11905  
170 -> 173 0.65354

Excited State 4: Singlet-A 3.5384 eV 350.40 nm  $f=0.4770$   $\langle S^{**2} \rangle=0.000$   
169 -> 171 0.65554  
170 -> 173 0.20904

Excited State 5: Singlet-A 3.6144 eV 343.03 nm  $f=0.0161$   $\langle S^{**2} \rangle=0.000$   
169 -> 172 -0.12690  
170 -> 174 0.59447  
170 -> 175 -0.30951

Excited State 6: Singlet-A 3.8244 eV 324.19 nm  $f=0.0202$   $\langle S^{**2} \rangle=0.000$   
169 -> 172 0.63364  
169 -> 173 0.11014  
170 -> 175 -0.20095

Excited State 7: Singlet-A 3.8725 eV 320.17 nm  $f=0.1820$   $\langle S^{**2} \rangle=0.000$   
170 -> 176 0.68748

Excited State 8: Singlet-A 3.9280 eV 315.64 nm  $f=0.0149$   $\langle S^{**2} \rangle=0.000$

|                   |           |           |           |          |              |
|-------------------|-----------|-----------|-----------|----------|--------------|
| 169 -> 172        | 0.16428   |           |           |          |              |
| 169 -> 174        | 0.10287   |           |           |          |              |
| 170 -> 174        | 0.31968   |           |           |          |              |
| 170 -> 175        | 0.57639   |           |           |          |              |
| Excited State 9:  | Singlet-A | 4.0462 eV | 306.42 nm | f=0.0070 | <S**2>=0.000 |
| 167 -> 171        | 0.67192   |           |           |          |              |
| 169 -> 177        | -0.11020  |           |           |          |              |
| Excited State 10: | Singlet-A | 4.1296 eV | 300.24 nm | f=0.0378 | <S**2>=0.000 |
| 168 -> 171        | 0.34700   |           |           |          |              |
| 169 -> 173        | 0.59630   |           |           |          |              |
| Excited State 11: | Singlet-A | 4.2060 eV | 294.78 nm | f=0.2175 | <S**2>=0.000 |
| 168 -> 171        | 0.58980   |           |           |          |              |
| 169 -> 173        | -0.32417  |           |           |          |              |
| Excited State 12: | Singlet-A | 4.2766 eV | 289.91 nm | f=0.0029 | <S**2>=0.000 |
| 170 -> 178        | 0.25874   |           |           |          |              |
| 170 -> 180        | -0.23348  |           |           |          |              |
| 170 -> 181        | 0.57222   |           |           |          |              |
| 170 -> 182        | 0.11827   |           |           |          |              |
| Excited State 13: | Singlet-A | 4.3090 eV | 287.73 nm | f=0.0098 | <S**2>=0.000 |
| 170 -> 178        | 0.54357   |           |           |          |              |
| 170 -> 180        | -0.12042  |           |           |          |              |
| 170 -> 181        | -0.32761  |           |           |          |              |
| 170 -> 182        | 0.17220   |           |           |          |              |
| 170 -> 184        | -0.15846  |           |           |          |              |
| Excited State 14: | Singlet-A | 4.3269 eV | 286.54 nm | f=0.0251 | <S**2>=0.000 |
| 169 -> 174        | -0.26044  |           |           |          |              |
| 169 -> 175        | -0.13732  |           |           |          |              |
| 170 -> 178        | 0.13853   |           |           |          |              |

170 -> 183 0.45783

170 -> 184 0.33211

Excited State 15: Singlet-A 4.3882 eV 282.54 nm f=0.0030 <S\*\*2>=0.000

160 -> 171 -0.13836

168 -> 172 0.23289

169 -> 174 0.47272

169 -> 175 0.14410

170 -> 175 -0.12810

170 -> 177 -0.20176

170 -> 183 0.18177

170 -> 184 0.16528

SavETr: write IOETrn= 770 NScale= 10 NData= 16 NLR=1 NState= 15 LETran= 280.
